# Supplementary material for: Which strategy for using medical and community masks? A prospective analysis of their environmental impact
Source: PubMed Central journal article supplement — BMJ Open. 2021 Sep 6;11(9):e049690. doi: 10.1136/bmjopen-2021-049690 (PMC8423512; doi:10.1136/bmjopen-2021-049690), 2021-09-06
Supplement: bmjopen-2021-049690.draft_revisions.pdf [file bmjopen-2021-049690.draft_revisions.pdf]

# BMJ Open

BMJ Open is committed to open peer review. As part of this commitment we make the peer review history of every article we publish publicly available.

When an article is published we post the peer reviewers' comments and the authors' responses online. We also post the versions of the paper that were used during peer review. These are the versions that the peer review comments apply to.

The versions of the paper that follow are the versions that were submitted during the peer review process. They are not the versions of record or the final published versions. They should not be cited or distributed as the published version of this manuscript.

BMJ Open is an open access journal and the full, final, typeset and author-corrected version of record of the manuscript is available on our site with no access controls, subscription charges or pay-per-view fees (<http://bmjopen.bmj.com>).

If you have any questions on BMJ Open's open peer review process please email [info.bmjopen@bmj.com](mailto:info.bmjopen@bmj.com)

# BMJ Open

## What is the environmental impact of different strategies for the use of medical and community masks?

|                               |                                                                                                                                                                                                                                                                                                                                                                                                               |
|-------------------------------|---------------------------------------------------------------------------------------------------------------------------------------------------------------------------------------------------------------------------------------------------------------------------------------------------------------------------------------------------------------------------------------------------------------|
| Journal:                      | <i>BMJ Open</i>                                                                                                                                                                                                                                                                                                                                                                                               |
| Manuscript ID                 | bmjopen-2021-049690                                                                                                                                                                                                                                                                                                                                                                                           |
| Article Type:                 | Original research                                                                                                                                                                                                                                                                                                                                                                                             |
| Date Submitted by the Author: | 29-Jan-2021                                                                                                                                                                                                                                                                                                                                                                                                   |
| Complete List of Authors:     | Bouchet, Alexandre; EA - Environmental action<br>Boucher, Julien; EA – environmental action; University of Applied Sciences and Arts Western Switzerland<br>Schutzbach, Kevin; Center for Primary Care and Public Health<br>Senn, Nicolas; Center for Primary Care and Public Health<br>Genton, Blaise; Center for Primary Care and Public Health<br>Vernez, David; Center for Primary Care and Public Health |
| Keywords:                     | COVID-19, PUBLIC HEALTH, Health & safety < HEALTH SERVICES ADMINISTRATION & MANAGEMENT                                                                                                                                                                                                                                                                                                                        |
|                               |                                                                                                                                                                                                                                                                                                                                                                                                               |

SCHOLARONE™  
Manuscripts

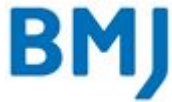

I, the Submitting Author has the right to grant and does grant on behalf of all authors of the Work (as defined in the below author licence), an exclusive licence and/or a non-exclusive licence for contributions from authors who are: i) UK Crown employees; ii) where BMJ has agreed a CC-BY licence shall apply, and/or iii) in accordance with the terms applicable for US Federal Government officers or employees acting as part of their official duties; on a worldwide, perpetual, irrevocable, royalty-free basis to BMJ Publishing Group Ltd ("BMJ") its licensees and where the relevant Journal is co-owned by BMJ to the co-owners of the Journal, to publish the Work in this journal and any other BMJ products and to exploit all rights, as set out in our [licence](#).

The Submitting Author accepts and understands that any supply made under these terms is made by BMJ to the Submitting Author unless you are acting as an employee on behalf of your employer or a postgraduate student of an affiliated institution which is paying any applicable article publishing charge ("APC") for Open Access articles. Where the Submitting Author wishes to make the Work available on an Open Access basis (and intends to pay the relevant APC), the terms of reuse of such Open Access shall be governed by a Creative Commons licence – details of these licences and which [Creative Commons](#) licence will apply to this Work are set out in our licence referred to above.

Other than as permitted in any relevant BMJ Author's Self Archiving Policies, I confirm this Work has not been accepted for publication elsewhere, is not being considered for publication elsewhere and does not duplicate material already published. I confirm all authors consent to publication of this Work and authorise the granting of this licence.

# 1 What is the environmental impact of different strategies for the use 2 of medical and community masks?

3  
4 Alexandre Bouchet<sup>1</sup>, Julien Boucher<sup>1,2</sup>, Kevin Schutzbach<sup>3</sup>, Nicolas Senn<sup>3</sup>, Blaise Genton<sup>3</sup>, David  
5 Vernez<sup>3</sup>

6 <sup>1</sup> EA – environmental action, research consultancy, Lausanne, Switzerland

7 <sup>2</sup> University of Applied Sciences and Arts Western Switzerland // HES-SO, HEIG-VD, Yverdon-les-  
8 Bains, Switzerland

9 <sup>3</sup> Department of Occupational Health and Environment, Center for Primary Care and Public Health  
10 (Unisanté), University of Lausanne, CH-1066 Epalinges, Switzerland

## 11 12 **Corresponding author**

13 Prof. David Vernez

14 David.Vernez@unisanté.ch

15 Phone: 0041 21 314 74 51

16 ORCID: 0000-0002-3304-8727

17  
18 [alexandre.bouchet@shaping-ea.com](mailto:alexandre.bouchet@shaping-ea.com); [julien.boucher@shaping-ea.com](mailto:julien.boucher@shaping-ea.com); [kevin.schutzbach@chuv.ch](mailto:kevin.schutzbach@chuv.ch);

19 [nicolas.senn@unisanté.ch](mailto:nicolas.senn@unisanté.ch); [blaise.genton@unisanté.ch](mailto:blaise.genton@unisanté.ch); [david.vernez@unisanté.ch](mailto:david.vernez@unisanté.ch)

20  
21  
22  
23 **Word count:** 3501 (without abstract and references)

## 24 25 26 **Keywords:**

27 Facemask, community mask, medical mask, recycling, reuse, carbon footprint, COVID-19

**Abstract****Introduction**

The use of protective masks, especially medical masks, increased dramatically during the COVID-19 crisis. Medical masks are made of synthetic materials, mainly polypropylene, and a majority of them are produced in China and imported to the European market. The urgency of the need has so far prevailed over environmental considerations.

**Objective**

Assess the environmental impact of different strategies for the use of facemask

**Method**

Different strategies for the use of medical and community masks are being investigated for their environmental impact in this study. 8 scenarios, differentiating the typologies of masks and the modes of reuse are compared using several environmental impact indicators, mainly the Global Warming Potential (GWP100), and the plastic leakage (PL). This study attempts to provide clear recommendations that consider both the environmental impact and the protective effectiveness of face masks used in the community.

**Results**

The environmental impact of single-use masks is the most unfavorable, with a GWP of 0.4 -1.3 kgCO<sub>2</sub> eq., depending on the transport scenario, and a PL of 1.8 g, for a one month protection against COVID-19. The use of home-made cotton masks and prolonged use of medical masks through wait-and-reuse are the scenarios with the lowest impact.

**Conclusion**

The use of medical masks with a wait and reuse strategy seems to be the most appropriate when considering both environmental impact and effectiveness. Our results also highlight the need to develop procedures and the legal/operational framework to extend the use of protective equipment during a pandemic.

1  
2  
3 55 **Strengths and limitations of this study**  
4  
5  
6 56  
7

- 8 57 - This study provides an environmental assessment (GWP 100, plastic leakage) for different  
9  
10 58 mask type and use strategies.  
11  
12  
13 59 - It recommends use or reuse strategies based on both performance and environmental  
14  
15 60 impacts.  
16  
17  
18 61 - The transportation and end-of-life assumptions are representative of an EU context.  
19  
20  
21 62 - As littering rates are poorly documented, plastic leakage in other geographic regions may  
22  
23 63 significantly differ.  
24  
25  
26 64 - Masks weight and composition used in this study are taken from regular European masks  
27  
28 65 disregarding the variability from one manufacturer to another.  
29  
30  
31 66  
32  
33 67  
34  
35  
36  
37  
38  
39  
40  
41  
42  
43  
44  
45  
46  
47  
48  
49  
50  
51  
52  
53  
54  
55  
56  
57  
58  
59  
60

## 68 Introduction

69 The COVID-19 crisis has led to dramatic changes in our daily habits. The consequences of these  
70 changes on the environment are still poorly understood. The decrease in industrial activity  
71 during confinement and the decline in intra- and inter-national mobility has led to a significant  
72 drop in CO<sub>2</sub> emissions<sup>1</sup>. An average decrease of 6.4% % in yearly CO<sub>2</sub> emissions was observed  
73 worldwide for 2020<sup>2</sup>. Positive effects have also been observed on other air pollutants, such  
74 as PM, NO<sub>x</sub>, SO<sub>2</sub> and on river pollution. However, some observations made in China, near  
75 Hubei's epicenter, show an unclear environmental picture, with a lower decrease in air  
76 pollutants than expected. This suggests that other effects, such as increased energy demand  
77 for household needs, must also be considered <sup>3</sup>. Due to the temporary nature of the  
78 confinement measures, some authors argue that the longer-term effects of the COVID-19  
79 crisis on the environmental footprint of human activities remain highly uncertain and may  
80 offset the observed short-term environmental benefits <sup>4</sup>. In the United States, a sharp drop  
81 in jet fuel and gasoline consumption has been observed during the crisis, leading to a decrease  
82 in CO<sub>2</sub> emissions of around 15%. However, it has been estimated that in a scenario of  
83 sustainable impact on the economy, the consequences of delayed investment in green energy  
84 and traffic-related emission reduction programs alone could outweigh the short-term effects  
85 <sup>5</sup>. The evolution of some activities or consumption patterns during the COVID-19 crisis are  
86 also likely to worsen the environmental balance: development of e-commerce (increase of  
87 transport distances and packaging), high consumption of disinfection products, massive  
88 COVID-19 screening in populations (increase in medical consumables).

89 The consumption of protective equipment and most particularly facemasks has also  
90 experienced a sharp increase during the crisis. To meet the growing demand, the production

1  
2  
3 91 of disposable masks has dramatically increased since the first pandemic wave <sup>6</sup>. By June 2020,  
4  
5  
6 92 China was producing 200 million facemasks per day, 20 times more than in February of the  
7  
8 93 same year <sup>7</sup>. With the second pandemic wave, the wearing of facemasks was mandatory in  
9  
10 94 closed spaces and densely populated areas in many countries. Medical masks and community  
11  
12  
13 95 masks have become essential tools in the fight against the spread of the virus.

14  
15 96 Given the wide use of facemasks, there is an urgent need to consider the environmental  
16  
17  
18 97 impact of this practice and ways to extend the life of this equipment. Several arguments can  
19  
20 98 be put forward: (1) the bulk of production comes from Asia, resulting in significant use of  
21  
22  
23 99 transportation to supply regions such as Europe and the United States, (2) medical masks are  
24  
25 100 intended for single use, resulting in additional waste and possible littering of used masks, and  
26  
27  
28 101 (3) medical masks and some community masks are made of plastic. Poor management of this  
29  
30 102 waste can therefore contribute to the presence of macroplastics and microplastics in the  
31  
32  
33 103 environment, particularly in the Ocean <sup>8</sup>. Considering that 3% of masks could enter the  
34  
35 104 environment (overall loss rate), it is estimated that up to 1.56 billions disposable masks could  
36  
37  
38 105 have entered the Ocean in 2020, which represents between 4680 and 6240 tons of plastic pollution  
39  
40 106 to the marine environment <sup>9</sup>. Life cycle assessment (LCA) conducted on facemasks in United  
41  
42 107 Kingdom also shows that the environmental impact of disposable masks are generally higher  
43  
44  
45 108 than recycled masks. In the absence of recycling, the production of waste in this country, as  
46  
47 109 a consequence of the use of one mask each day for a year by the entire British population,  
48  
49  
50 110 was estimated at  $1,24 \cdot 10^5$  tons, including  $0,66 \cdot 10^5$  tons of non-recyclable contaminated plastic  
51  
52 111 <sup>10</sup>. Many countries are attempting to restrict the use of single-use plastics, including  
53  
54  
55 112 restricting the use of plastic bags. The increase in plastic waste is putting pressure on the  
56  
57 113 waste management system to find new strategies to deal with this change <sup>11</sup>. On the other



1  
2  
3 114 hand, there is good evidence that face masks used in the community provide protection  
4  
5  
6 115 against Covid-19 infections <sup>12</sup>, even though effectiveness can be very different according to  
7  
8 116 the type of masks, the wearing adherence or the environmental parameters (humidity,  
9  
10  
11 117 heat,..).

12  
13 118 In this study, we aim to explore and compare the environmental impact of the different masks  
14  
15 119 used in the community and attempt to provide clear recommendations on the best  
16  
17  
18 120 compromise between protection effectiveness and environmental impact.  
19

20 121

22 122

24 123

26 124

## 125 **Method**

126 The environmental impact assessment proposed in this study is based on: (1) the construction of  
127 scenarios of mask use in the general population, distinguishing their typology and modalities of reuse,  
128 and (2) the analysis of these scenarios using three impact indicators, reflecting global warming, plastic  
129 littering and ecological scarcity (UBP method).

### 130 **Mask typology**

131 Three types of masks, intended for general public use, were considered: medical masks, community  
132 masks and labelled community masks.

133 Medical masks (or surgical masks) are originally intended for single use and designed to protect  
134 patients from possible pathogens exhaled by the medical personnel. In the context of the COVID-19  
135 pandemic, these masks have been widely used outside of healthcare settings to protect the public by  
136 preventing pathogens from leaving the wearer and thus from being transmitted to others in the  
137 vicinity of the wearer. In Europe, medical masks must meet the requirements of EN 14683 and must  
138 comply with the Medical Products Directive (Directive 93/42/EEC). Medical masks are constituted of  
139 3 different layers of nonwoven fabric, generally in polypropylene (referred here below as PP masks)  
140 <sup>13</sup>. A majority of them are produced in China and imported by ship in large quantities on the European  
141 market. However, during the first pandemic wave in spring 2020, due to the lack of Filtering Facepiece  
142 Respirators and medical masks, emergency shipments were made by air.

143 The term community mask encompasses all non-professional masks that are intended to protect the  
144 general public from infection, essentially in reducing the emissions from the wearer (source control).  
145 Community masks range from homemade cotton masks (referred here below as COT masks) to more  
146 or less sophisticated textile masks. Community masks have the advantage that they can be produced  
147 locally, either centrally in the case of commercial masks, or at home for personal use. The performance  
148 of community masks is not subject to legal requirements, so their quality can vary greatly. In some  
149 countries, quality labels have been proposed, allowing minimum performance requirements to be

1  
2  
3 150 defined on a voluntary basis. This is the case, for instance, of the French AFNOR label and of the Swiss  
4  
5 151 TESTEX label (referred here below as PES masks). Currently, labelled masks represent only a minority  
6  
7  
8 152 of production, probably due to higher manufacturing costs. While "common" community masks are  
9  
10 153 generally made of cotton or other textiles of natural origin, labelled masks, which require greater  
11  
12 154 technicality, are made of polymers, such as elastane or polyester. Community trade masks without  
13  
14 155 labels were considered to come from the wider European market. For the labelled masks, the origin  
15  
16 156 is more specific, since the AFNOR and TESTEX labelled masks are, to our knowledge, only produced in  
17  
18  
19 157 France and Switzerland respectively.

20  
21 158

### 22 23 159 **Reuse strategy**

24  
25 160 The lack of protective means and the need to extend the life cycle of masks during the first COVID-19  
26  
27  
28 161 wave generated numerous studies on their reuse. Although medical masks are normally intended for  
29  
30 162 single use, it has been shown that certain physical treatments such as UVC, microwaves or dry heat  
31  
32 163 can effectively decontaminate them without significantly altering their barrier capacity. The latter  
33  
34 164 method is of particular interest for the treatment of medical masks, as it is accessible in all households.  
35  
36 165 It has been shown exposure to at least 70°C for 30 min is sufficient to effectively decontaminate  
37  
38  
39 166 surgical masks or respirators<sup>14-16</sup>.

40  
41 167 Another alternative, which has yet to be validated, is the wait & reuse strategy. The viability of the  
42  
43 168 virus deposited on a surface decreases significantly after a few hours. Tests on surgical masks have  
44  
45 169 shown that under ambient temperature and humidity conditions (22°C, 65% RH), a 3-log reduction in  
46  
47  
48 170 **virus load** was achieved after 4 to 7 days<sup>17</sup>. In a similar way to what has been proposed by the  
49  
50 171 N95Decon scientific group for respirators, surgical masks could therefore be stored at room  
51  
52 172 temperature for 7 days before being reused (by the same user).

53  
54 173 The situation with community masks is more straightforward since they are designed with the intent  
55  
56  
57 174 of cleaning and reusing by the general public. The issue of maintaining performance is also less critical

1  
2  
3 175 since there are no legal requirements for this type of mask. The strategy considered here is therefore  
4  
5 176 that of a reuse after a decontamination at home in a washing machine at 60°C. Labelled community  
6  
7 177 mask are a special situation, since maintaining their performances is conditioned by the limitation of  
8  
9 178 the number of washing cycles, to 20 and 5 washes for the AFNOR and TESTEX labels, respectively<sup>18,19</sup>.

10  
11  
12 179

### 13 14 15 180 **Environmental Impact assessment**

16  
17 181 This study follows the methodology of life cycle assessment (LCA) and considers all the life cycle stages  
18  
19 182 of the different masks including production, transport, use (decontamination) and end of life. The  
20  
21 183 primary data sources used and hypothesis are referenced throughout this article. The secondary data  
22  
23 184 used for impact characterization used to perform the LCA analysis are based on the Ecoinvent  
24  
25 185 database (<https://www.ecoinvent.org/database/database.html>) unless otherwise mentioned; the  
26  
27 186 functional unit (FU) chosen for the comparison of the masks is “to equip one person with a mask during  
28  
29 187 a month”. Several environmental impact indicators were considered:

30  
31  
32 188

- 33  
34 189 - The Global Warming Potential (GWP100) index, which expresses the impact of manufacturing,  
35  
36 190 transporting and recycling masks in terms of greenhouse gases. GWP100 expresses the time-  
37  
38 191 integrated warming effect, over a 100 year period, due to the release of a given greenhouse gas  
39  
40 192 in today's atmosphere, relative to that of carbon dioxide (in mass unit kg)<sup>20</sup>.
- 41  
42  
43 193 - The UBP method relies on the methodological concept of ecological scarcity and expresses the  
44  
45 194 environmental impact in terms of eco-points. It encompasses for instance the water footprint of  
46  
47 195 cotton production as well as the biodiversity impact of energy production during the use phase.  
48  
49 196 However. Calculation using the UBP method has been performed and is available in Appendix  
50  
51 197 S1.
- 52  
53  
54 198 - The plastic leakage (PL), which expresses the amount of plastic leaving the technosphere and  
55  
56 199 cumulating in the natural environment. PL measures the quantity of plastic ultimately released

1  
2  
3 200 into the ocean or into the other compartments (freshwater, soils, other terrestrial  
4  
5 201 environments) including both microplastics and macroplastics<sup>21</sup> The littering rate used by  
6  
7 202 default for on-the-go plastic is generally ranging between 2%<sup>22,23</sup> and 12%<sup>24</sup>. A recent study  
8  
9 203 focusing on masks articulates a littering rate of 3% worldwide. In this study, we used a 2%  
10  
11  
12 204 littering rate<sup>21</sup>.

13  
14 205 The destination chosen for masks transport is Switzerland. However, shipping origin and method  
15  
16 206 vary as masks can come from Switzerland, France or China, and be transported either by truck, boat  
17  
18 207 or plane. Different assumptions are made for additional environmental burdens during the use  
19  
20 208 phase of the mask life cycle according to the decontamination method. For the decontamination in  
21  
22 209 a washing machine, we consider a household washing machine cycle running at 60°C during 1h40  
23  
24 210 with a dry load of 6 kg of clothes with an energy use of 1.8 kWh/cycle, a water use of 67.6 L/cycle  
25  
26 211 and a soap consumption of 65 g/cycle<sup>25</sup>. For the oven sterilization we assume that, based on  
27  
28 212 personal measurement, an oven running at 70°C during 30 min consumes 0.345 kWh of electricity.  
29  
30 213 In the end of life stage, we assumed that all masks were incinerated after disposal. Heat and  
31  
32 214 electricity recovery efficiencies in Europe vary quite significantly between different plants, at  
33  
34 215 average values of 31% for heat and 12% for electricity<sup>26</sup>. The strategies for using the masks and the  
35  
36 216 corresponding assessment parameters are summarized in Table 1.  
37  
38  
39  
40

41 217

42  
43 218

44  
45  
46 219  
47  
48  
49  
50  
51  
52  
53  
54  
55  
56  
57  
58  
59  
60

220

| Scenario | Mask type                            | Material                                           | Weight [g]        | Origin                | Transport (main) | Re-use                   | Consumption mask/month <sup>a</sup> |
|----------|--------------------------------------|----------------------------------------------------|-------------------|-----------------------|------------------|--------------------------|-------------------------------------|
| PP_1     | Medical mask                         | Polypropylene (PP) / Nylon /Aluminium <sup>b</sup> | 3.2 (2.5/0.5/0.2) | China                 | Boat             | No                       | 30                                  |
| PP_2     |                                      | Polypropylene (PP) / Nylon /Aluminium              | 3.2 (2.5/0.5/0.2) | China                 | Plane            | No                       | 30                                  |
| PP_3     |                                      | Polypropylene (PP) / Nylon /Aluminium              | 3.2 (2.5/0.5/0.2) | China                 | Boat             | Hot drying, 30 min. 70°C | 3                                   |
| PP_4     |                                      | Polypropylene (PP) / Nylon /Aluminium              | 3.2 (2.5/0.5/0.2) | China                 | Boat             | Wait and reuse           | 3 <sup>c</sup>                      |
| COT_1    | Unlabelled community mask            | Cotton (COT)                                       | 5                 | China                 | Boat             | Washing machine 60°C     | 2                                   |
| COT_2    |                                      | Cotton (COT)                                       | 5                 | Homemade <sup>d</sup> | -                | Washing machine 60°C     | 2                                   |
| PES_1    | Labelled community mask <sup>e</sup> | Elastane / polyester (PES)                         | 6.3 (0.13/6.17)   | France                | Truck            | Washing machine 60°      | 2                                   |
| PES_2    |                                      | Elastane / polyester (PES)                         | 6.3 (0.13/6.17)   | Switzerland           | Truck            | Washing machine 60°      | 6                                   |

221

222 <sup>a</sup> Number of worn-out masks disposed of and then replaced by a user during a month (consumption = 30/nb. of expected reuses)223 <sup>a</sup> Aluminium nose strip224 <sup>c</sup> One mask is used each weekday, for 10 reuses225 <sup>d</sup> made from old cloth/fabric226 <sup>e</sup> Considering the French quality label AFNOR (scenario PES\_1) and the Swiss quality label Testex (scenario PES\_2)

227

228 *Table 1. Summary of Mask typology and uses scenarios*

## 229 Results

### 230 Global warming potential

231 The CO<sub>2</sub>- equivalent impact of the different scenarios of mask use is presented in Figure 1. The use of  
232 disposable masks brought by plane (scenario PP\_2), as experienced during the Personal Protective  
233 Equipment (PPE) shortage of the first pandemic wave, is by far the most detrimental with 1.3 kg/CO<sub>2</sub>  
234 eq./FU. Without taking this extreme situation into account, a strong variability is observed between  
235 the different scenarios of mask use. There is a factor of 30 between the most unfavourable scenario  
236 (PP\_1 - disposable medical mask brought by boat) and the most favourable scenario (COT\_2 – Home-  
237 made washable cotton mask). The differences observed are largely due to the absence of  
238 manufacturing impact from the second-hand fabric as well as a very low contribution from the usage  
239 phase in scenario COT\_2. The decontamination of medical masks by heating (PP\_3) is not very  
240 advantageous, as well as the use of community masks made of polymers, as long as the number of  
241 reuse cycles remains limited. Taking into account the discounted emissions from incineration after  
242 disposal leads to a negative contribution of the end of life stage to the total CO<sub>2</sub>-equivalent emissions  
243 in all scenarios except COT\_1 and COT\_2. Overall, the most advantageous scenarios are home-made  
244 cotton masks (COT\_2) and the extended use of medical masks through a wait and reuse strategy  
245 (PP\_4).

246  
247 Figure 1 about here

248  
249 Results similar to those of the carbon footprint are obtained by considering a broader impact indicator,  
250 such as UBP, which integrates water consumption (see Supplementary file S1). The impact related to  
251 use increases for all masks when recycled multiple times. The most advantageous scenarios remain  
252 however the home-made cotton masks (COT\_2) and the extended use of medical masks through a  
253 wait and reuse strategy (PP\_4). Notably, the impact of decontamination of medical masks by heating

1  
2  
3 254 (PP\_3) is more than doubled, making it less advantageous than the single-use scenario of medical  
4  
5 255 masks shipped from China by boat (PP\_1).  
6  
7  
8 256

9  
10 257 **Plastic leakage (PL)**  
11

12 258 The impact of the different scenarios of mask use from the point of view of plastic leakage is  
13  
14 259 presented in Figure 2. Unsurprisingly, cotton masks do not generate plastic leakage. Disposable  
15  
16 260 medical masks have a high PL of 1.8 g/FU. However, this impact can be reduced by a factor of 10 by  
17  
18 261 reuse procedures, which proportionally reduce production needs.  
19  
20  
21  
22 262

23  
24 263 *Figure 2 about here*  
25  
26  
27 264

28  
29  
30 265 **Number of reuse**  
31

32  
33 266 The number of reuses used in the scenarios is based on an estimate of current practices and  
34  
35 267 recommendations. Arguably, this may change depending on usage conditions, material quality, or  
36  
37 268 changes in mask labelling requirements. The effect of the number of reuses on the GWP100 is shown  
38  
39 269 in figure 3. Interestingly, commercial cotton masks (COT\_1) reused less than 8 times generate more  
40  
41 270 CO<sub>2</sub>eq than disposable medical masks shipped by boat (PP\_1). Moreover, when used less than 17  
42  
43 271 times commercial cotton masks (COT\_1) generate more CO<sub>2</sub>eq than medical masks decontaminated  
44  
45 272 through dry heating (PP\_3). The increase in the number of reuse decreases the gap between the two  
46  
47 273 most advantageous scenarios: home-made cotton masks (COT\_2) and the recycling of medical masks  
48  
49 274 through a wait and reuse strategy (PP\_4).  
50  
51  
52

53 275  
54  
55  
56 276  
57  
58  
59 277  
60

*Figure 3 about here*



## 278 Discussion

279 The estimation of the environmental impact carried out, shows that there are important differences  
 280 between the strategies of use of the masks. At the population level, these differences are not  
 281 negligible. We quantified how much CO<sub>2</sub>eq impact and plastic leakage would be avoided within a  
 282 year in Switzerland if 10% of the entire population was to shift from single-use masks transported by  
 283 boat (PP\_1) to either a wait and reuse strategy for the same masks (PP\_4) or home-made cotton  
 284 masks from old fabric (COT\_2). Results are reported in Table 2, considering a Swiss population  
 285 8'606'033 in 2019 (source: Federal Statistical Office).

|                   | CO <sub>2</sub> eq impact avoided<br>[t CO <sub>2</sub> eq.] | Plastic leakage avoided<br>[t PL] |
|-------------------|--------------------------------------------------------------|-----------------------------------|
| shifting to PP_4  | 4'077                                                        | 17                                |
| shifting to COT_2 | 4'400                                                        | 19                                |

286  
 287 *Table 2. Environmental impact of a shift from the use of disposable masks to reuse strategies in 10%*  
 288 *of the Swiss population.*

289 For an impact per passenger transport by aircraft (person.km) of 0.129 kgCO<sub>2</sub>eq (source: Reffnet.ch)  
 290 and an average 1.5L plastic bottle weight of 32.6 g<sup>27</sup>, the uptake of the wait and reuse strategy by  
 291 for the medical masks (PP\_4) by 10% of the population would be equivalent to saving CO<sub>2</sub>eq  
 292 emissions from 5'402 individual flights from Paris to New York and preventing 570'219 plastic  
 293 bottles (1.5L) from being littered. Similarly, the uptake of home-made cotton masks (COT\_2) by the  
 294 same population share would result in CO<sub>2</sub>eq emissions savings analogous to 5'830 individual air  
 295 travels from Paris to New York, and a plastic leakage avoided corresponding to 513'194 plastic  
 296 bottles (1.5L).

297 From the point of view of the effectiveness of their individual or collective protection, masks are not  
 298 all equal. The comparison of their performance is not obvious because several parameters influence  
 299 their effectiveness (droplet penetration, aerosol penetration, fitting to the face, wettability...)<sup>12</sup> and  
 300 only medical masks as well as labelled community masks (e.g. AFNOR label) have minimum

1  
2  
3 301 performance requirements for some of these parameters while a high variability in performance is  
4  
5 302 to be expected among unlabelled community masks.  
6  
7

8 303 The filtration efficiency of the membrane as such has been investigated by several experimental  
9  
10 304 studies. Aydin et al. report filtration efficiencies for large droplets in the 100  $\mu$ - 1mm range of over  
11  
12 305 98% for surgical masks and 93-98% for unlabelled community masks of different materials (cotton,  
13  
14 306 polyester and silk)<sup>28</sup>. For finer particles, the performance of unlabelled community masks is however  
15  
16 307 lower. In the 10 $\mu$  range (PM<sub>10</sub>), Neupane et al. show a filtration efficiency of 94% for surgical masks  
17  
18 308 and 63% and 84% for community masks<sup>29</sup>. Systematic reviews of the laboratory results obtained so  
19  
20 309 far suggest that community masks have satisfactory filtration efficiency for large particles (e.g. >  
21  
22 310 5 $\mu$ m), but that they have only limited effectiveness against aerosols.  
23  
24

25  
26 311 However, the overall performance of the masks is not limited to filtration efficiency alone and will be  
27  
28 312 affected by leaks due to poor fitting to the face, but also by the way the masks are used. Wearing a  
29  
30 313 face mask in a community logic is moreover primarily intended as a collective protection (by  
31  
32 314 reducing the emission of the wearer), rather than an individual protection. This collective  
33  
34 315 effectiveness is difficult to quantify due to the complexity of exposure situations and the presence of  
35  
36 316 other contamination routes (e.g surface contamination). Randomized studies conducted previously  
37  
38 317 on the transmission of viral infections in the community, showed that wearing a mask provided  
39  
40 318 some protection in the most adherent individuals<sup>30</sup> or when mask use is accompanied by hand  
41  
42 319 hygiene measures and/or education on viral infections<sup>31 32</sup>.  
43  
44  
45  
46

47 320 The use of medical masks with a wait and reuse strategy seems to be the most appropriate when  
48  
49 321 considering both environmental impact and effectiveness. Expectations, in terms of mask  
50  
51 322 performance, are generally fairly limited. However, face masks contribute to collective protection by  
52  
53 323 reducing droplet emissions and, to a lesser extent, aerosol emissions from infected wearers.  
54  
55  
56 324 However, the lack of minimum performance requirements for unlabelled community face masks,  
57  
58  
59  
60

1  
2  
3 325 makes this contribution uncertain. Standardized masks, which offer guarantees in terms of  
4  
5 326 performance and reproducibility, are therefore beneficial from this point of view.  
6  
7  
8 327 Labelled community masks are also an interesting alternative. Their environmental performance is  
9  
10 328 currently limited by the number of planned cycles of use, which requires frequent replacement. An  
11  
12 329 increase in the number of use cycles covered by the label would reduce significantly their  
13  
14 330 environmental impact. Overall, our results highlight the need to develop procedures and the  
15  
16 331 legal/operational framework to extend the use of protective equipment during a pandemic. Such an  
17  
18 332 approach would not only reduce the environmental impact of the masks, but also make the public  
19  
20 333 health system more resilient in the event of equipment shortages. Last but not least, adopting a wait  
21  
22 334 and reuse strategy with medical masks is probably the most economical, which is important in terms  
23  
24 335 of access to protective measures for people with limited financial resources<sup>33</sup>.  
25  
26  
27  
28

### 29 336 **Acknowledgments**

30  
31 337 The authors would like to thank Prof. J. Cornuz from Unisanté, for his advice and ideas in the  
32  
33 338 development of this study.  
34

### 35 339 **Competing interests**

36  
37  
38 340 The authors declare no competing interest  
39

### 40 341 **Author contribution**

41  
42  
43 342 JB, NS, BG and DV developed the study concept and design. AB and JB conducted the impact  
44  
45 343 assessment. DV wrote the first draft of the manuscript with contributions from JB, AB and NS. All  
46  
47 344 authors contributed to and have approved the final manuscript.  
48  
49

### 50 345 **Funding**

51  
52  
53 346 The authors received no funding to perform this study.  
54

### 55 347 **Patient consent for publication**

56  
57  
58 348 Not required  
59

### 60 349 **Data availability statement**

1  
2  
3 350 Detailed primary and secondary data used for this study are available upon request.  
4

5 351 **Ethics approval**  
6

7  
8 352 This study does not involve research with human subjects.  
9

10 353  
11

12  
13 354  
14  
15  
16  
17  
18  
19  
20  
21  
22  
23  
24  
25  
26  
27  
28  
29  
30  
31  
32  
33  
34  
35  
36  
37  
38  
39  
40  
41  
42  
43  
44  
45  
46  
47  
48  
49  
50  
51  
52  
53  
54  
55  
56  
57  
58  
59  
60

For peer review only

355 **References**

- 356 1. Le Quéré C, Jackson RB, Jones MW, et al. Temporary reduction in daily global CO2 emissions during  
357 the COVID-19 forced confinement. *Nature Climate Change* 2020;10(7):647-53. doi:  
358 10.1038/s41558-020-0797-x
- 359 2. Tollefson J. COVID curbed carbon emissions in 2020 - but not by much. *Nature* 2021;589(7842):343.  
360 doi: 10.1038/d41586-021-00090-3 [published Online First: 2021/01/17]
- 361 3. Almond D, Du X, Zhang S. Did COVID-19 improve air quality near hubei? . In: 2020 NBoER, ed.,  
362 2020.
- 363 4. Klemeš JJ, Fan YV, Jiang P. The energy and environmental footprints of COVID-19 fighting  
364 measures - PPE, disinfection, supply chains. *Energy (Oxf)* 2020;211:118701-01. doi:  
365 10.1016/j.energy.2020.118701 [published Online First: 2020/08/27]
- 366 5. Gillingham KT, Knittel CR, Li J, et al. The Short-run and Long-run Effects of Covid-19 on Energy and  
367 the Environment. *Joule* 2020;4(7):1337-41. doi: <https://doi.org/10.1016/j.joule.2020.06.010>
- 368 6. Fadare OO, Okoffo ED. Covid-19 face masks: A potential source of microplastic fibers in the  
369 environment. *Science of The Total Environment* 2020;737:140279. doi:  
370 <https://doi.org/10.1016/j.scitotenv.2020.140279>
- 371 7. Aragaw TA. Surgical face masks as a potential source for microplastic pollution in the COVID-19  
372 scenario. *Mar Pollut Bull* 2020;159:111517-17. doi: 10.1016/j.marpolbul.2020.111517  
373 [published Online First: 2020/07/25]
- 374 8. Shruti VC, Pérez-Guevara F, Elizalde-Martínez I, et al. Reusable masks for COVID-19: A missing  
375 piece of the microplastic problem during the global health crisis. *Mar Pollut Bull*  
376 2020;161:111777. doi: <https://doi.org/10.1016/j.marpolbul.2020.111777>
- 377 9. Phelps Bondaroff T, Cooke S. Masks on the Beach: The impact of COVID-19 on marine plastic  
378 pollution. Gary Stokes ed: OceansAsia, 2020.
- 379 10. Allison AL, Ambrose-Dempster E, Domenech Aparsi T, et al. The impact and effectiveness of the  
380 general public wearing masks to reduce the spread of pandemics in the UK: a multidisciplinary  
381 comparison of single-use masks versus reusable face masks: UCL Press, 2020.
- 382 11. Klemeš JJ, Fan YV, Tan RR, et al. Minimising the present and future plastic waste, energy and  
383 environmental footprints related to COVID-19. *Renewable and Sustainable Energy Reviews*  
384 2020;127:109883. doi: <https://doi.org/10.1016/j.rser.2020.109883>
- 385 12. Brainard J, Jones NR, Lake IR, et al. Community use of face masks and similar barriers to prevent  
386 respiratory illness such as COVID-19: a rapid scoping review. *Euro surveillance : bulletin*  
387 *European sur les maladies transmissibles = European communicable disease bulletin*  
388 2020;25(49) doi: 10.2807/1560-7917.es.2020.25.49.2000725 [published Online First:  
389 2020/12/12]
- 390 13. Chua MH, Cheng W, Goh SS, et al. Face Masks in the New COVID-19 Normal: Materials, Testing,  
391 and Perspectives. *Research* 2020;2020:7286735. doi: 10.34133/2020/7286735
- 392 14. Liao L, Xiao W, Zhao M, et al. Can N95 Respirators Be Reused after Disinfection? How Many  
393 Times? *ACS Nano* 2020;14(5):6348-56. doi: 10.1021/acsnano.0c03597 [published Online First:  
394 2020/05/06]
- 395 15. Pascoe MJ, Robertson A, Crayford A, et al. Dry heat and microwave generated steam protocols for  
396 the rapid decontamination of respiratory personal protective equipment in response to COVID-  
397 19-related shortages. *The Journal of hospital infection* 2020 doi: 10.1016/j.jhin.2020.07.008  
398 [published Online First: 2020/07/12]
- 399 16. Ou Q, Pei C, Chan Kim S, et al. Evaluation of decontamination methods for commercial and  
400 alternative respirator and mask materials - view from filtration aspect. *J Aerosol Sci*  
401 2020;150:105609-09. doi: 10.1016/j.jaerosci.2020.105609 [published Online First: 2020/06/24]
- 402 17. Chin A, Chu J, Perera M, et al. Stability of SARS-CoV-2 in different environmental conditions.  
403 *medRxiv* 2020:2020.03.15.20036673. doi: 10.1101/2020.03.15.20036673
- 404 18. AFNOR. Masques barrières - Guide d'exigences minimales, de méthodes d'essais, de confection  
405 et d'usage. Paris: AFNOR SPEC S76-001 version 1.10, 2020:45.
- 406 19. TESTEX. Factsheet - Community Masks Zurich: TESTEX AG; 2020 [updated January 2021.  
407 Available from: <https://www.testex.com/en/communitymask/>.
- 408 20. IPCC. Climate change. The Intergovernmental Panel on Climate Change, scientific assessment;.  
409 Agriculture, Ecosystems & Environment. Cambridge: Cambridge University Press, 1990:339.
- 410 21. Boucher J, Billard G, Simeone E, et al. The marine plastic footprint : towards a science-based metric  
411 for measuring marine plastic leakage and increasing the materiality and circularity of plastic.  
412 Gland, Switzerland: IUCN, Global Marine and Polar Programme, 2020:70.

- 1  
2  
3 413 22. Jambeck JR, Geyer R, Wilcox C, et al. Plastic waste inputs from land into the ocean. *Science*  
4 414 2015;347(6223):768. doi: 10.1126/science.1260352
- 5 415 23. Boucher J, Faure F, Pompini O, et al. (Micro) plastic fluxes and stocks in Lake Geneva basin. *TrAC*  
6 416 *Trends in Analytical Chemistry* 2019;112:66-74. doi: <https://doi.org/10.1016/j.trac.2018.11.037>
- 7 417 24. ICF e. Assessment of measures to reduce marine litter from single use plastics. Luxembourg:  
8 418 European Commission, Directorate-General for Environment, 2018.
- 9 419 25. Bourrier C. Washing Machine - ETH Sustainability Summer School 2011 [Web archive]. Zurich:  
10 420 ETH; 2011 [Available from: [http://webarchiv.ethz.ch/sustainability-](http://webarchiv.ethz.ch/sustainability-v2/lehre/Sommerakademien/so2011/washies_report.pdf)  
11 421 [v2/lehre/Sommerakademien/so2011/washies\\_report.pdf](http://webarchiv.ethz.ch/sustainability-v2/lehre/Sommerakademien/so2011/washies_report.pdf).
- 12 422 26. Reimann D. CEWEP Energy Report III: Results of Specific Data for Energy, R1 Plant Efficiency  
13 423 Factor and NCV of 314 European Waste-to-Energy (WtE) Plants. Bamberg, Germany: CEWEP,  
14 424 Confederation of European Waste-to-Energy Plants, 2012.
- 15 425 27. Islam M, Uddin MJ, Alshehri K. Plastic Waste and Carbon Footprint Generation Due to the  
16 426 Consumption of Bottled Waters in Saudi Arabia. *Research & Development in Material Science*  
17 427 2018;5 doi: 10.31031/RDMS.2018.05.000604
- 18 428 28. Aydin O, Emon B, Cheng S, et al. Performance of fabrics for home-made masks against the spread  
19 429 of COVID-19 through droplets: A quantitative mechanistic study. *Extreme Mechanics Letters*  
20 430 2020;40:100924. doi: 10.1016/j.eml.2020.100924 [published Online First: 2020/08/25]
- 21 431 29. Neupane BB, Mainali S, Sharma A, et al. Optical microscopic study of surface morphology and  
22 432 filtering efficiency of face masks. *PeerJ* 2019;7:e7142-e42. doi: 10.7717/peerj.7142
- 23 433 30. MacIntyre CR, Cauchemez S, Dwyer DE, et al. Face mask use and control of respiratory virus  
24 434 transmission in households. *Emerging infectious diseases* 2009;15(2):233-41. doi:  
25 435 10.3201/eid1502.081167
- 26 436 31. Aiello AE, Perez V, Coulborn RM, et al. Facemasks, hand hygiene, and influenza among young  
27 437 adults: a randomized intervention trial. *PloS one* 2012;7(1):e29744-e44. doi:  
28 438 10.1371/journal.pone.0029744 [published Online First: 2012/01/25]
- 29 439 32. Larson EL, Ferng YH, Wong-McLoughlin J, et al. Impact of non-pharmaceutical interventions on  
30 440 URIs and influenza in crowded, urban households. *Public health reports (Washington, DC :  
31 441 1974)* 2010;125(2):178-91. doi: 10.1177/003335491012500206 [published Online First:  
32 442 2010/03/20]
- 33 443 33. Siu JY. Health inequality experienced by the socially disadvantaged populations during the outbreak  
34 444 of COVID-19 in Hong Kong: An interaction with social inequality. *Health & social care in the  
35 445 community* 2020 doi: 10.1111/hsc.13214 [published Online First: 2020/10/31]
- 36 446  
37 447  
38 448  
39 449  
40 449  
41 450  
42  
43  
44  
45  
46  
47  
48  
49  
50  
51  
52  
53  
54  
55  
56  
57  
58  
59  
60

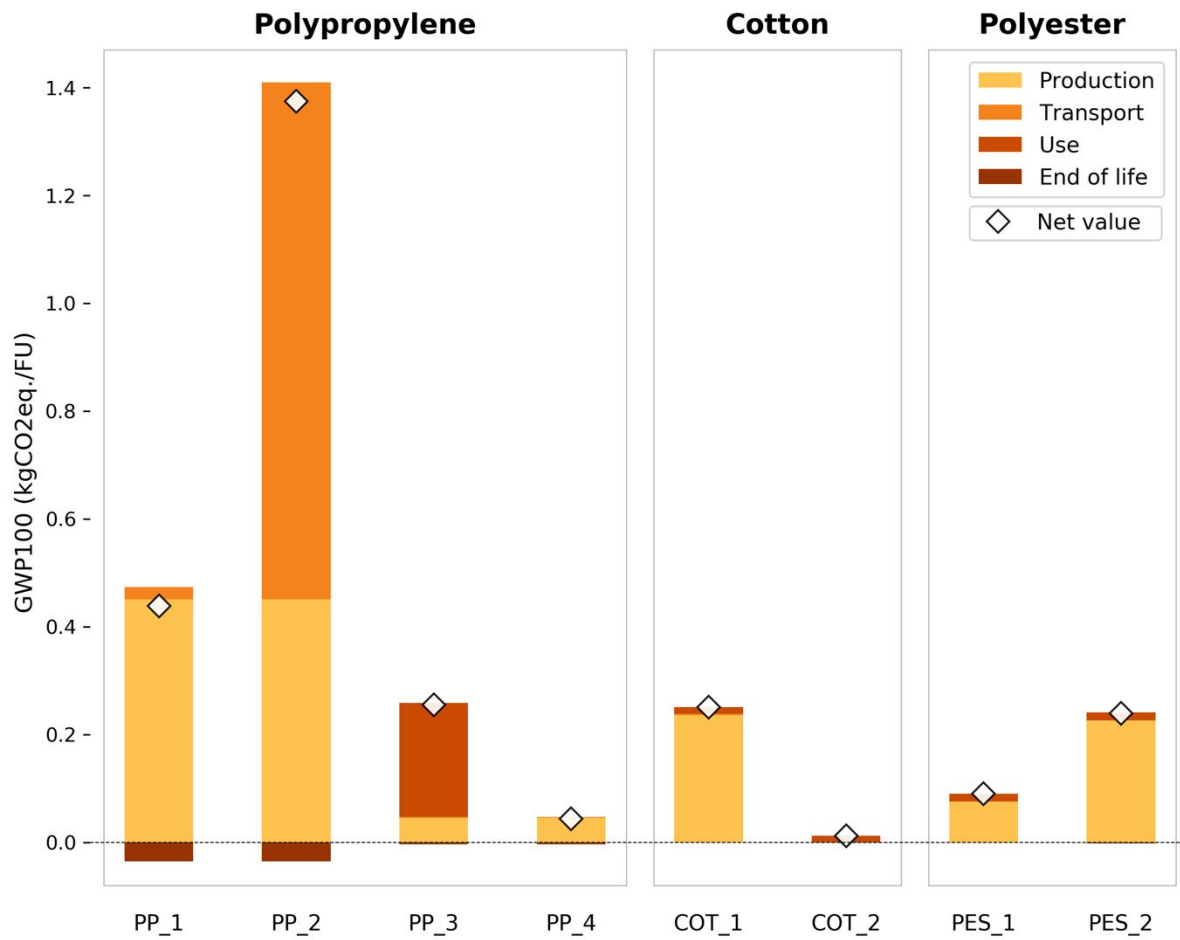

Figure 1. Footprint expressed in GWP100 (kg CO<sub>2</sub> eq./FU) for different scenario of mask uses.

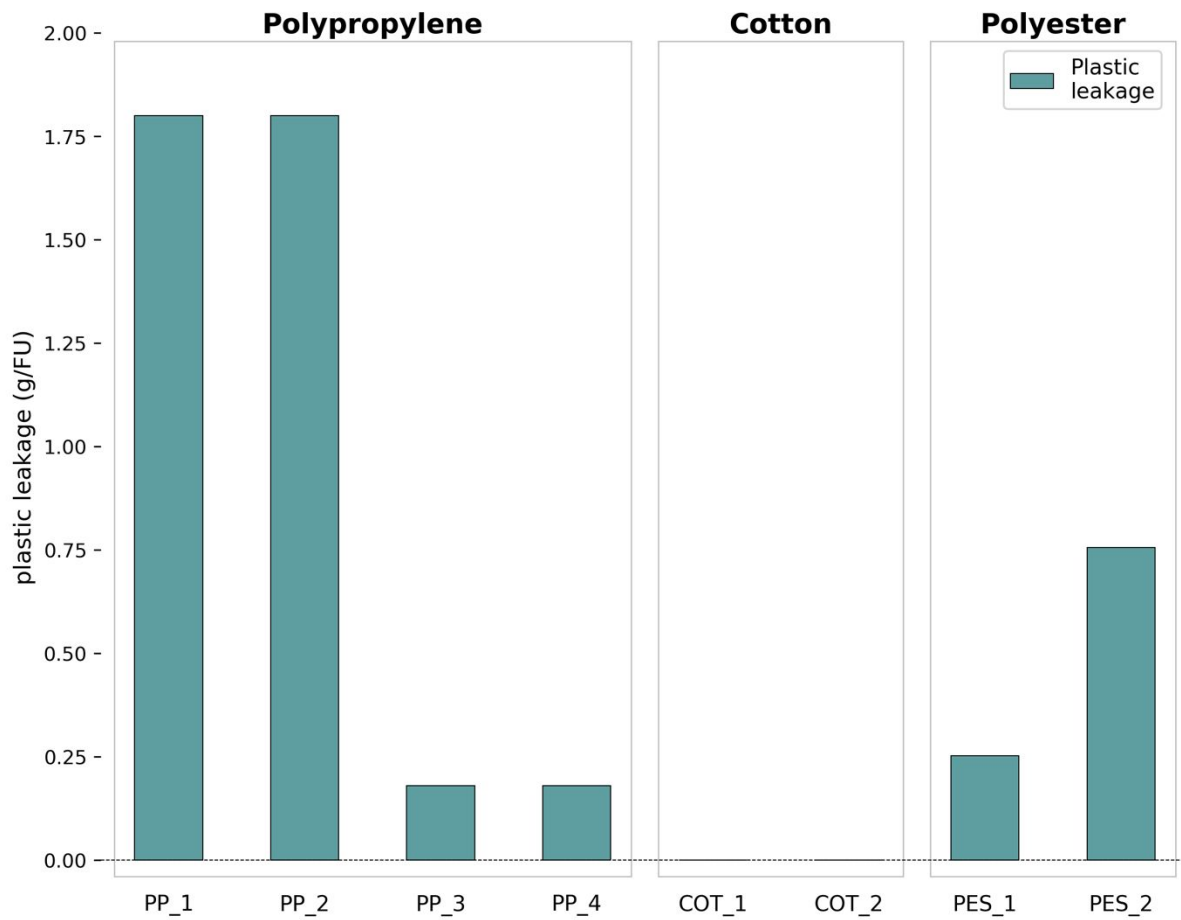

Figure 2. Footprint expressed in plastic leakage (g/FU) for different scenarios of mask uses.



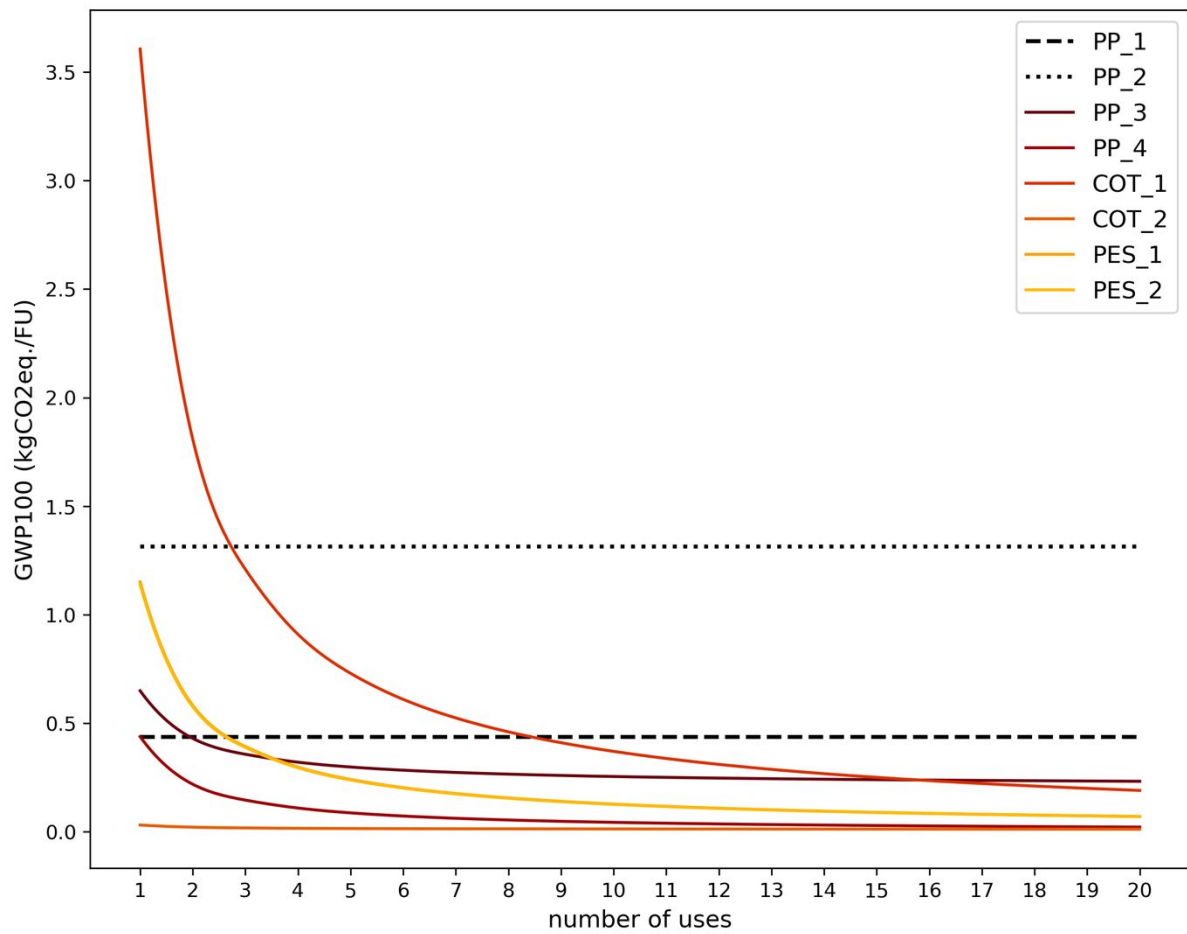

Figure 3. Footprint expressed in GWP100 (kgCO<sub>2</sub>eq./FU) for different scenarios as a function of number of uses

## Appendix S1

In addition to the Global Warming Potential (GWP100) index, we assessed other environmental impacts with an aggregated impact metric specific to Switzerland called UBP, which is the abbreviation of the German word “Umweltbelastungspunkte”. The UBP method aggregates all individual impacts from a standard LCA assessment into a single parameter. It is based on legally defined targets for pollutant emissions and resource consumption, and measures the differences between current emission values and these specific target values. The further the current status is from the target, the greater the number of points assigned to an emission. For more details, see Frischknecht et al. (Frischknecht and Büsler Knöpfel 2013).

The UBP impacts of the different scenarios of mask use are presented in Figure S1. Similarly to the CO<sub>2</sub>-equivalent impacts (see Figure 1), the use of disposable masks brought by plane (scenario PP\_2) results in the highest impact in terms of UBP. The largest discrepancies between the global warming potential and UBP results occur in scenarios PP\_3 and COT\_1. In scenario PP\_3, the UBP impact of the use phase is very large with an unfavourable contribution of the electricity consumption to run the oven, while the production phase of the cotton fabric increases the relative impact of cotton masks manufactured abroad (scenario COT\_1) with respect to other scenarios when compared with the global warming potential results. Nonetheless, the least impactful scenarios remain the home-made cotton masks (COT\_2) and the extended use of medical masks through a wait and reuse strategy (PP\_4), which provides a coherent picture when it comes to the best practices for community protection with a mask in times of pandemic.

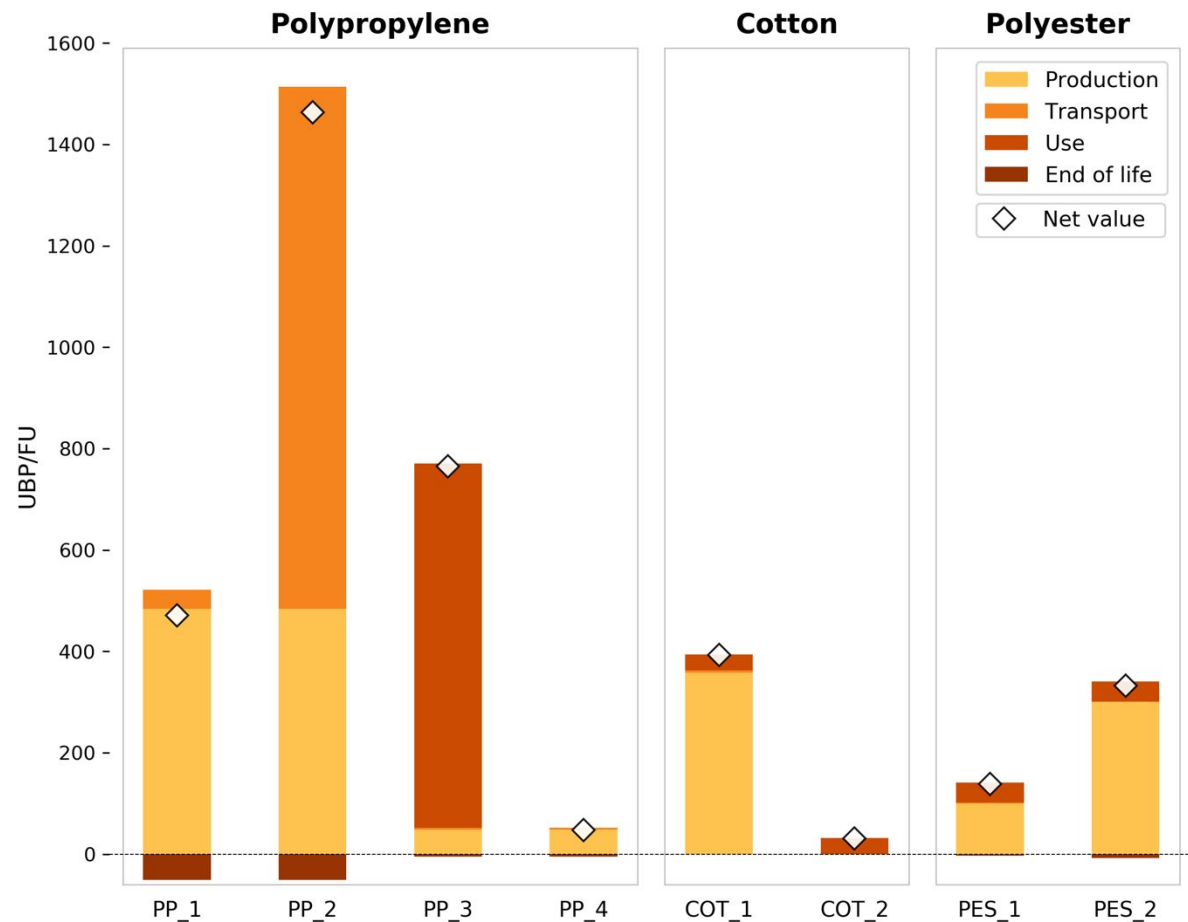

Figure S1. Footprint expressed in UBP /FU for different scenario of mask uses.

Frischknecht, Rolf, and Sybille Büsser Knöpfel. 2013. "Swiss Eco-Factors 2013 according to the Ecological Scarcity Method. Methodological fundamentals and their application in Switzerland." In *Environmental studies* no. 1330, 254. Bern: Federal Office for the Environment.

# BMJ Open

## Which strategy for using medical and community masks? A prospective analysis of their environmental impact.

|                                 |                                                                                                                                                                                                                                                                                                                                                                                                               |
|---------------------------------|---------------------------------------------------------------------------------------------------------------------------------------------------------------------------------------------------------------------------------------------------------------------------------------------------------------------------------------------------------------------------------------------------------------|
| Journal:                        | <i>BMJ Open</i>                                                                                                                                                                                                                                                                                                                                                                                               |
| Manuscript ID                   | bmjopen-2021-049690.R1                                                                                                                                                                                                                                                                                                                                                                                        |
| Article Type:                   | Original research                                                                                                                                                                                                                                                                                                                                                                                             |
| Date Submitted by the Author:   | 27-Jun-2021                                                                                                                                                                                                                                                                                                                                                                                                   |
| Complete List of Authors:       | Bouchet, Alexandre; EA - Environmental action<br>Boucher, Julien; EA – environmental action; University of Applied Sciences and Arts Western Switzerland<br>Schutzbach, Kevin; Center for Primary Care and Public Health<br>Senn, Nicolas; Center for Primary Care and Public Health<br>Genton, Blaise; Center for Primary Care and Public Health<br>Vernez, David; Center for Primary Care and Public Health |
| <b>Primary Subject Heading</b>: | Public health                                                                                                                                                                                                                                                                                                                                                                                                 |
| Secondary Subject Heading:      | Health policy                                                                                                                                                                                                                                                                                                                                                                                                 |
| Keywords:                       | COVID-19, PUBLIC HEALTH, Health & safety < HEALTH SERVICES ADMINISTRATION & MANAGEMENT                                                                                                                                                                                                                                                                                                                        |
|                                 |                                                                                                                                                                                                                                                                                                                                                                                                               |

SCHOLARONE™  
Manuscripts



I, the Submitting Author has the right to grant and does grant on behalf of all authors of the Work (as defined in the below author licence), an exclusive licence and/or a non-exclusive licence for contributions from authors who are: i) UK Crown employees; ii) where BMJ has agreed a CC-BY licence shall apply, and/or iii) in accordance with the terms applicable for US Federal Government officers or employees acting as part of their official duties; on a worldwide, perpetual, irrevocable, royalty-free basis to BMJ Publishing Group Ltd ("BMJ") its licensees and where the relevant Journal is co-owned by BMJ to the co-owners of the Journal, to publish the Work in this journal and any other BMJ products and to exploit all rights, as set out in our [licence](#).

The Submitting Author accepts and understands that any supply made under these terms is made by BMJ to the Submitting Author unless you are acting as an employee on behalf of your employer or a postgraduate student of an affiliated institution which is paying any applicable article publishing charge ("APC") for Open Access articles. Where the Submitting Author wishes to make the Work available on an Open Access basis (and intends to pay the relevant APC), the terms of reuse of such Open Access shall be governed by a Creative Commons licence – details of these licences and which [Creative Commons](#) licence will apply to this Work are set out in our licence referred to above.

Other than as permitted in any relevant BMJ Author's Self Archiving Policies, I confirm this Work has not been accepted for publication elsewhere, is not being considered for publication elsewhere and does not duplicate material already published. I confirm all authors consent to publication of this Work and authorise the granting of this licence.

1  
2  
3  
4 1 **Which strategy for using medical and community masks? A**  
5  
6 2 **prospective analysis of their environmental impact.**  
7

8 3 Alexandre Bouchet<sup>1</sup>, Julien Boucher<sup>1,2</sup>, Kevin Schutzbach<sup>3</sup>, Nicolas Senn<sup>3</sup>, Blaise Genton<sup>3</sup>, David  
9 4 Vernez<sup>3</sup>

10 5 <sup>1</sup> EA – environmental action, research consultancy, Lausanne, Switzerland

11 6 <sup>2</sup> University of Applied Sciences and Arts Western Switzerland // HES-SO, HEIG-VD, Yverdon-les-  
12 7 Bains, Switzerland

13 8 <sup>3</sup> Department of Occupational Health and Environment, Center for Primary Care and Public Health  
14 9 (Unisanté), University of Lausanne, CH-1066 Epalinges, Switzerland

15  
16  
17  
18  
19  
20  
21 11 **Corresponding author**

22 12 Prof. David Vernez

23 13 David.Vernez@unisante.ch

24 14 Phone: 0041 21 314 74 51

25 15 ORCID: 0000-0002-3304-8727

26  
27  
28  
29  
30  
31 17 [alexandre.bouchet@shaping-ea.com](mailto:alexandre.bouchet@shaping-ea.com); [julien.boucher@shaping-ea.com](mailto:julien.boucher@shaping-ea.com); [kevin.schutzbach@chuv.ch](mailto:kevin.schutzbach@chuv.ch);  
32 18 [nicolas.senn@unisante.ch](mailto:nicolas.senn@unisante.ch); [blaise.genton@unisante.ch](mailto:blaise.genton@unisante.ch); [david.vernez@unisante.ch](mailto:david.vernez@unisante.ch)

33  
34  
35  
36  
37  
38  
39  
40  
41 22 **Word count:** 3501 (without abstract and references)

42  
43  
44  
45  
46  
47 25 **Keywords:**

48  
49 26 Facemask, community mask, medical mask, recycling, reuse, carbon footprint, COVID-19

## 29 **Abstract**

### 30 **Introduction**

31 The use of personal protective equipment, especially medical masks, increased dramatically during  
32 the COVID-19 crisis. Medical masks are made of synthetic materials, mainly polypropylene, and a  
33 majority of them are produced in China and imported to the European market. The urgency of the  
34 need has so far prevailed over environmental considerations.

### 35 **Objective**

36 Assess the environmental impact of different strategies for the use of facemask

### 37 **Method**

38 A prospective analysis was conducted to assess the environmental impact of different strategies for  
39 the use of medical and community masks. 8 scenarios, differentiating the typologies of masks and the  
40 modes of reuse are compared using three environmental impact indicators: the Global Warming  
41 Potential (GWP100), the ecological scarcity (UBP method) and the plastic leakage (PL). This study  
42 attempts to provide clear recommendations that consider both the environmental impact and the  
43 protective effectiveness of face masks used in the community.

### 44 **Results**

45 The environmental impact of single-use masks is the most unfavorable, with a GWP of 0.4 -1.3 kgCO<sub>2</sub>  
46 eq., depending on the transport scenario, and a PL of 1.8 g, for a one month protection against COVID-  
47 19. The use of home-made cotton masks and prolonged use of medical masks through wait-and-reuse  
48 are the scenarios with the lowest impact.

### 49 **Conclusion**

50 The use of medical masks with a wait and reuse strategy seems to be the most appropriate when  
51 considering both environmental impact and effectiveness. Our results also highlight the need to  
52 develop procedures and the legal/operational framework to extend the use of protective equipment  
53 during a pandemic.

1  
2  
3 54 **Strengths and limitations of this study**  
4  
5  
6 55  
7

- 8 56 - This study provides an environmental assessment based on three indicators (GWP 100, UBP,  
9 plastic leakage) for different mask type and use strategies.  
10 57  
11  
12  
13 58 - -Eight mask use and reuse strategies were considered.  
14  
15 59 - - The assumptions used in the life cycle assessment (transport, end of life, littering) are  
16 based on the European context and do not necessarily apply to other regions.  
17 60  
18  
19  
20 61 - The weight and composition of the masks used in this study are those of typical,  
21 commercially available masks, but do not represent the variability from one manufacturer to  
22 62 another.  
23  
24 63  
25  
26  
27 64  
28  
29  
30  
31  
32  
33  
34  
35  
36  
37  
38  
39  
40  
41  
42  
43  
44  
45  
46  
47  
48  
49  
50  
51  
52  
53  
54  
55  
56  
57  
58  
59  
60



## 65 Introduction

66 The decrease in industrial activity during the COVID-19 confinement and the decline in intra-  
67 and inter-national mobility has led to a significant drop in CO<sub>2</sub> emissions<sup>1</sup>. An average  
68 decrease of 6.4% % in yearly CO<sub>2</sub> emissions was observed worldwide for 2020<sup>2</sup>. Positive  
69 effects have also been observed on other air pollutants, such as PM, NO<sub>x</sub>, SO<sub>2</sub> and on river  
70 pollution<sup>3</sup>. However, some observations made in China, near Hubei's epicenter, show an  
71 unclear environmental picture, with a lower decrease in air pollutants than expected<sup>4</sup>. Due to  
72 the temporary nature of the confinement measures, some authors argue that the longer-term  
73 effects of the COVID-19 crisis on the environmental footprint of human activities remain  
74 highly uncertain and may offset the observed short-term environmental benefits <sup>5</sup>. In the  
75 United States, a sharp drop in jet fuel and gasoline consumption has been observed during  
76 the crisis, leading to a decrease in CO<sub>2</sub> emissions of around 15%. However, it has been  
77 estimated that in a scenario of sustainable impact on the economy, the consequences of  
78 delayed investment in green energy and traffic-related emission reduction programs alone  
79 could outweigh the short-term effects <sup>6</sup>. The evolution of some activities or consumption  
80 patterns during the COVID-19 crisis are also likely to worsen the environmental balance:  
81 development of e-commerce (increase of transport distances and packaging), high  
82 consumption of disinfection products, massive COVID-19 screening in populations (increase  
83 in medical consumables).

84 The consumption of protective equipment and most particularly facemasks has also  
85 experienced a sharp increase during the crisis<sup>7 8</sup>. To meet the growing demand, the  
86 production of disposable masks has dramatically increased since the first pandemic wave <sup>9</sup>.  
87 By June 2020, China was producing 200 million facemasks per day, 20 times more than in

1  
2  
3 88 February of the same year<sup>10</sup>. With the second pandemic wave, the wearing of facemasks was  
4  
5  
6 89 mandatory in closed spaces and densely populated areas in many countries. Medical masks  
7  
8 90 and community masks have become essential tools in the fight against the spread of the virus.  
9  
10 91 Given the extensive use of facemasks, there is an urgent need to take into account the  
11  
12 92 environmental impact of this practice and ways to extend the life of this equipment. Several  
13  
14 93 arguments can be put forward: (1) the bulk of production comes from Asia<sup>11</sup>, resulting in  
15  
16 94 significant use of transportation to supply regions such as Europe and the United States, (2)  
17  
18 95 medical masks are intended for single use, resulting in additional waste and possible littering  
19  
20 96 of used masks, and (3) medical masks and some community masks are made of plastic. Poor  
21  
22 97 management of this waste can therefore contribute to the presence of macroplastics and  
23  
24 98 microplastics in the environment, particularly in the Ocean<sup>12</sup>. Considering that 3% of masks  
25  
26 99 could enter the environment (overall loss rate), it is estimated that up to 1.56 billions  
27  
28 100 disposable masks could have entered the Ocean in 2020, which represents between 4680 and  
29  
30 101 6240 tons of plastic pollution to the marine environment<sup>13</sup>. Life cycle assessment (LCA)  
31  
32 102 conducted on facemasks in United Kingdom also shows that the environmental impact of  
33  
34 103 disposable masks are generally higher than recycled masks. In the absence of recycling, the  
35  
36 104 production of waste in this country, as a consequence of the use of one mask each day for a  
37  
38 105 year by the entire British population, was estimated at 124'000 tons, including 66'000 tons of  
39  
40 106 non-recyclable contaminated plastic<sup>14</sup>. Many countries are attempting to restrict the use of  
41  
42 107 single-use plastics, including restricting the use of plastic bags. The increase in plastic waste  
43  
44 108 is putting pressure on the waste management system to find new strategies to deal with this  
45  
46 109 change<sup>15</sup>. On the other hand, there is good evidence that face masks used in the community  
47  
48 110 provide protection against Covid-19 infections<sup>16</sup>, even though effectiveness can be very  
49  
50  
51  
52  
53  
54  
55  
56  
57  
58  
59  
60

1  
2  
3 111 different according to the type of masks, the wearing adherence or the environmental  
4  
5  
6 112 parameters (humidity, heat,..).  
7

8 113 In this study, we aim to explore and compare the environmental impact of the different masks  
9  
10 114 used in the community and attempt to provide clear recommendations on the best  
11  
12  
13 115 compromise between protection effectiveness and environmental impact.  
14

15 116  
16

17  
18 117  
19

20 118  
21

22 119  
23  
24  
25  
26  
27  
28  
29  
30  
31  
32  
33  
34  
35  
36  
37  
38  
39  
40  
41  
42  
43  
44  
45  
46  
47  
48  
49  
50  
51  
52  
53  
54  
55  
56  
57  
58  
59  
60

For peer review only

## 120 **Method**

121 The environmental impact assessment proposed in this study is based on: (1) the construction of  
122 scenarios of mask use in the general population, distinguishing their typology and modalities of reuse,  
123 and (2) the analysis of these scenarios using three impact indicators, reflecting global warming, plastic  
124 littering and ecological scarcity (UBP method).

### 125 **Mask typology**

126 Three types of masks, intended for general public use, were considered: medical masks, community  
127 masks and labelled community masks. Filtering facepiece respirators, such as N95 (US) and FFP2 (EU),  
128 which are mainly used by healthcare professionals are not considered in this study.

129 Medical masks (or surgical masks) are originally intended for single use and designed to protect  
130 patients from possible pathogens exhaled by the medical personnel. In the context of the COVID-19  
131 pandemic, these masks have been widely used outside of healthcare settings to protect the public by  
132 preventing pathogens from leaving the wearer and thus from being transmitted to others in the  
133 vicinity of the wearer. In Europe, medical masks must meet the requirements of EN 14683 and must  
134 comply with the Medical Devices Directive (EU) 2017/745. Medical masks are usually constituted of 3  
135 different layers of nonwoven fabric, generally in polypropylene (referred here below as PP masks)<sup>17</sup>.

136 A majority of them are produced in China and imported by ship in large quantities on the European  
137 market. However, during the first pandemic wave in spring 2020, due to the lack of Filtering Facepiece  
138 Respirators and medical masks, emergency shipments were made by air.

139 The term community mask encompasses all non-professional masks that are intended to protect the  
140 general public from infection, essentially in reducing the emissions from the wearer (source control).

141 Community masks range from homemade cotton masks (referred here below as COT masks) to more  
142 or less sophisticated textile masks. Community masks have the advantage that they can be produced  
143 locally, either centrally in the case of commercial masks, or at home for personal use. The performance  
144 of community masks is not subject to legal requirements, so their quality can vary greatly. In some

1  
2  
3 145 countries, quality labels have been proposed, allowing minimum performance requirements to be  
4  
5 146 defined on a voluntary basis. This is the case, for instance, of the French AFNOR label and of the Swiss  
6  
7 147 TESTEX label (referred here below as PES masks). Currently, labelled masks represent only a minority  
8  
9 148 of production, probably due to higher manufacturing costs. While "common" community masks are  
10  
11 149 generally made of cotton or other textiles of natural origin, labelled masks, which require greater  
12  
13 150 technicality, are made of polymers, such as elastane or polyester. Community trade masks without  
14  
15 151 labels were considered to come from the wider European market. For the labelled masks, the origin  
16  
17 152 is more specific, since the AFNOR and TESTEX labelled masks are, to our knowledge, only produced in  
18  
19 153 France and Switzerland respectively.  
20  
21  
22

23 154

### 25 155 **Reuse strategy**

27 156 The lack of protective means and the need to extend the life cycle of masks during the first COVID-19  
28  
29 157 wave generated numerous studies on their reuse. Although medical masks are normally intended for  
30  
31 158 single use, it has been shown that certain physical treatments such as UVC, microwaves or dry heat  
32  
33 159 can effectively decontaminate them without significantly altering their barrier capacity. The latter  
34  
35 160 method is of particular interest for the treatment of medical masks, as it is accessible in all households.  
36  
37 161 It has been shown exposure to at least 70°C for 30 min is sufficient to effectively decontaminate  
38  
39 162 surgical masks or respirators<sup>18-20</sup>.  
40  
41  
42

43 163 Another alternative, which has yet to be validated, is the wait & reuse strategy. The viability of the  
44  
45 164 virus deposited on a surface decreases significantly after a few hours. Tests on surgical masks have  
46  
47 165 shown that under ambient temperature and humidity conditions (22°C, 65% RH), a 3-log reduction in  
48  
49 166 virus load was achieved after 4 to 7 days<sup>21</sup>. In a similar way to what has been proposed by the  
50  
51 167 N95Decon scientific group for respirators, surgical masks could therefore be stored at room  
52  
53 168 temperature for 7 days before being reused (by the same user).  
54  
55  
56  
57  
58  
59  
60

1  
2  
3 169 The situation with community masks is more straightforward since they are designed with the intent  
4  
5 170 of cleaning and reusing by the general public. The issue of maintaining performance is also less critical  
6  
7 171 since there are no legal requirements for this type of mask. The strategy considered here is therefore  
8  
9 172 that of a reuse after a decontamination at home in a washing machine at 60°C. Labelled community  
10  
11 173 mask are a special situation, since maintaining their performances is conditioned by the limitation of  
12  
13 174 the number of washing cycles, to 20 and 5 washes for the AFNOR and TESTEX labels, respectively <sup>22</sup><sup>23</sup>.  
14  
15  
16  
17  
18

175

### 19 176 **Environmental Impact assessment**

20 177

21 178

Figure 1 about here

22 179

23  
24  
25  
26  
27  
28 180 This study follows the methodology of life cycle assessment (LCA) and considers all the life cycle stages  
29  
30 181 of the different masks including production, transport, use (decontamination) and end of life (see  
31  
32 182 Figure 1). The primary data sources used and hypothesis are referenced throughout this article. The  
33  
34 183 secondary data used for impact characterization used to perform the LCA analysis are based on the  
35  
36 184 Ecoinvent database (<https://www.ecoinvent.org/database/database.html>). A proprietary excel tool  
37  
38 185 developed by the authors was used to perform the LCA based on Ecoinvent datasets. Unless otherwise  
39  
40 186 mentioned; the functional unit (FU) chosen for the comparison of the masks is “to equip one person  
41  
42 187 with a mask during a month”. Several environmental impact indicators were considered:  
43  
44  
45

46 188

- 47  
48 189 - The Global Warming Potential (GWP100) index, which expresses the impact of manufacturing,  
49  
50 190 transporting and recycling masks in terms of greenhouse gases. GWP100 expresses the time-  
51  
52 191 integrated warming effect, over a 100 year period, due to the release of a given greenhouse gas  
53  
54 192 in today's atmosphere, relative to that of carbon dioxide (in mass unit kg)<sup>24</sup>.  
55  
56  
57  
58  
59  
60

1  
2  
3 193 - The UBP method relies on the methodological concept of ecological scarcity and expresses the  
4  
5 194 environmental impact in terms of eco-points. It encompasses for instance the water footprint of  
6  
7 195 cotton production as well as the biodiversity impact of energy production during the use phase.  
8  
9  
10 196 However. Calculation using the UBP method has been performed and is available in Appendix  
11  
12 197 S1.

13  
14 198 - The plastic leakage (PL), which expresses the amount of plastic leaving the technosphere and  
15  
16 199 cumulating in the natural environment. PL measures the quantity of plastic ultimately released  
17  
18 200 into the ocean or into the other compartments (freshwater, soils, other terrestrial  
19  
20 201 environments) including both microplastics and macroplastics<sup>25</sup> Leakage is a result of both loss  
21  
22 202 and release and can be simply described by the following equation:

23  
24  
25 203 
$$\text{Leakage} = \text{Waste} \cdot \text{Loss rate} \cdot \text{Release rate (with Loss rate = mismanaged rate +}$$
  
26  
27 204 
$$\text{littering rate )}$$

28  
29  
30 205 In the case of Switzerland, the only loss occurring is related to littering since the mismanaged  
31  
32 206 rate is equal to 0%. The littering rate will then be assimilated to the leakage rate as we are here  
33  
34 207 assessing the release rate to all environmental compartments at once. The littering rate used by  
35  
36 208 default for on-the-go plastic is generally ranging between 2%<sup>26 27</sup> and 12%<sup>28</sup>. A recent study  
37  
38 209 focusing on masks articulates a littering rate of 3% worldwide. In this study, we used a 2%  
39  
40 210 littering rate<sup>25</sup>.

41  
42  
43 211 The destination chosen for masks transport is Switzerland. However, shipping origin and method  
44  
45 212 vary as masks can come from Switzerland, France or China, and be transported either by truck, boat  
46  
47 213 or plane. Different assumptions are made for additional environmental burdens during the use  
48  
49 214 phase of the mask life cycle according to the decontamination method. For the decontamination in  
50  
51 215 a washing machine, we consider a household washing machine cycle running at 60°C during 1h40  
52  
53 216 with a dry load of 6 kg of clothes with an energy use of 1.8 kWh/cycle, a water use of 67.6 L/cycle  
54  
55 217 and a soap consumption of 65 g/cycle<sup>29</sup>. We have allocated the energy, water and soap used to

1  
2  
3 218 wash a mask based on the ratio between the weight of the mask and the total dry load of clothes  
4  
5 219 assumed when running one cycle. These consumptions features have then been scaled up to  
6  
7 220 represent the functional unit chosen for the study. For the oven sterilization we assume that, based  
8  
9 221 on personal measurement, an oven running at 70°C during 30 min consumes 0.345 kWh of  
10  
11 222 electricity. As the oven utilization is exclusively dedicated to sterilizing masks, we had to make an  
12  
13 223 assumption on the number of masks being sterilized at once. We assumed that a batch of 5 masks  
14  
15 224 were sterilized for each oven utilization, hence an energy consumption of 0.069 kWh per mask  
16  
17 225 sterilized.  
18  
19 226 In the end of life stage, we assumed that all masks were incinerated after disposal. Heat and  
20  
21 227 electricity recovery efficiencies in Europe vary quite significantly between different plants, at  
22  
23 228 average values of 31% for heat and 12% for electricity<sup>30</sup>. The strategies for using the masks and the  
24  
25 229 corresponding assessment parameters are summarized in Table 1.  
26  
27  
28  
29  
30  
31  
32  
33  
34  
35  
36  
37  
38  
39  
40  
41  
42  
43  
44  
45  
46  
47  
48  
49  
50  
51  
52  
53  
54  
55  
56  
57  
58  
59  
60

230

### 231 **Patient and public involvement**

232 No patient involved.

233

234



235

| Scenario | Mask type                            | Material                                           | Weight [g]        | Origin                | Transport (main) | Re-use                   | Consumption mask/month <sup>a</sup> |
|----------|--------------------------------------|----------------------------------------------------|-------------------|-----------------------|------------------|--------------------------|-------------------------------------|
| PP_1     | Medical mask                         | Polypropylene (PP) / Nylon /Aluminium <sup>b</sup> | 3.2 (2.5/0.5/0.2) | China                 | Boat             | No                       | 30                                  |
| PP_2     |                                      | Polypropylene (PP) / Nylon /Aluminium              | 3.2 (2.5/0.5/0.2) | China                 | Plane            | No                       | 30                                  |
| PP_3     |                                      | Polypropylene (PP) / Nylon /Aluminium              | 3.2 (2.5/0.5/0.2) | China                 | Boat             | Hot drying, 30 min. 70°C | 3                                   |
| PP_4     |                                      | Polypropylene (PP) / Nylon /Aluminium              | 3.2 (2.5/0.5/0.2) | China                 | Boat             | Wait and reuse           | 3 <sup>c</sup>                      |
| COT_1    | Unlabelled community mask            | Cotton (COT)                                       | 5                 | China                 | Boat             | Washing machine 60°C     | 2                                   |
| COT_2    |                                      | Cotton (COT)                                       | 5                 | Homemade <sup>d</sup> | -                | Washing machine 60°C     | 2                                   |
| PES_1    | Labelled community mask <sup>e</sup> | Elastane / polyester (PES)                         | 6.3 (0.13/6.17)   | France                | Truck            | Washing machine 60°      | 2                                   |
| PES_2    |                                      | Elastane / polyester (PES)                         | 6.3 (0.13/6.17)   | Switzerland           | Truck            | Washing machine 60°      | 6                                   |

236

237 <sup>a</sup> Number of worn-out masks disposed of and then replaced by a user during a month (consumption = 30/nb. of expected reuses)

238 <sup>a</sup> Aluminium nose strip

239 <sup>c</sup> One mask is used each weekday, for 10 reuses

240 <sup>d</sup> made from old cloth/fabric

241 <sup>e</sup> Considering the French quality label AFNOR (scenario PES\_1) and the Swiss quality label Testex (scenario PES\_2)

242

243 *Table 1. Summary of Mask typology and uses scenarios*

## 244 Results

### 245 Global warming potential

246 The CO<sub>2</sub>- equivalent impact of the different scenarios of mask use is presented in Figure 2. The use of  
247 disposable masks brought by plane (scenario PP\_2), as experienced during the Personal Protective  
248 Equipment (PPE) shortage of the first pandemic wave, is by far the most detrimental with 1.3 kg/CO<sub>2</sub>  
249 eq./FU. Without taking this extreme situation into account, a strong variability is observed between  
250 the different scenarios of mask use. There is a factor of 30 between the most unfavourable scenario  
251 (PP\_1 - disposable medical mask brought by boat) and the most favourable scenario (COT\_2 – Home-  
252 made washable cotton mask). The differences observed are largely due to the absence of  
253 manufacturing impact from the second-hand fabric as well as a very low contribution from the usage  
254 phase in scenario COT\_2. The decontamination of medical masks by heating (PP\_3) is not very  
255 advantageous, as well as the use of community masks made of polymers, as long as the number of  
256 reuse cycles remains limited. Taking into account the discounted emissions from incineration after  
257 disposal leads to a negative contribution of the end of life stage to the total CO<sub>2</sub>-equivalent emissions  
258 in all scenarios except COT\_1 and COT\_2. The use of labelled community mask (PES\_1 and PES\_2) has  
259 an intermediate environmental impact, the use of AFNOR masks (French label) being more  
260 advantageous than the TESTEX mask (Swiss label). The difference between the two is mainly due to  
261 the different number of reuses recommended between the two labels. Overall, the most  
262 advantageous scenarios are home-made cotton masks (COT\_2) and the extended use of medical  
263 masks through a wait and reuse strategy (PP\_4).

264  
265 Figure 2 about here

266  
267 Results similar to those of the carbon footprint are obtained by considering a broader impact indicator,  
268 such as UBP, which integrates water consumption (see Supplementary file S1). The impact related to  
269 use increases for all masks when recycled multiple times. The most advantageous scenarios remain

1  
2  
3 270 however the home-made cotton masks (COT\_2) and the extended use of medical masks through a  
4  
5 271 wait and reuse strategy (PP\_4). Notably, the impact of decontamination of medical masks by heating  
6  
7 272 (PP\_3) is more than doubled, making it less advantageous than the single-use scenario of medical  
8  
9 273 masks shipped from China by boat (PP\_1).

274

### 275 **Plastic leakage (PL)**

16 276 The impact of the different scenarios of mask use from the point of view of plastic leakage is  
17  
18 277 presented in Figure 3. Unsurprisingly, cotton masks do not generate plastic leakage. Disposable  
19  
20 278 medical masks have a high PL of 1.8 g/FU. However, this impact can be reduced by a factor of 10 by  
21  
22 279 reuse procedures, which proportionally reduce production needs.

280

281 *Figure 3 about here*

### 282 **Number of reuse**

32 283 The number of reuses used in the scenarios is based on an estimate of current practices and  
33  
34 284 recommendations. Arguably, this may change depending on usage conditions, material quality, or  
35  
36 285 changes in mask labelling requirements. The effect of the number of reuses on the GWP100 is shown  
37  
38 286 in figure 4. Interestingly, commercial cotton masks (COT\_1) reused less than 8 times generate more  
39  
40 287 CO<sub>2</sub>eq than disposable medical masks shipped by boat (PP\_1). Moreover, when used less than 17  
41  
42 288 times commercial cotton masks (COT\_1) generate more CO<sub>2</sub>eq than medical masks decontaminated  
43  
44 289 through dry heating (PP\_3). The increase in the number of reuse decreases the gap between the two  
45  
46 290 most advantageous scenarios: home-made cotton masks (COT\_2) and the recycling of medical masks  
47  
48 291 through a wait and reuse strategy (PP\_4). The curves for scenarios PES\_1 and PES\_2 are overlapping  
49  
50 292 in Figure 4 since the composition of EMPA and AFNOR masks has been assumed identical. The only  
51  
52 293 slight difference between these scenarios, although not significant enough to distinguish both curves  
53  
54 294 on the graph, stems from the distinct origins of the masks.

295

296

297

*Figure 4 about here*

298

**Discussion**

Consistent with what has been highlighted by other authors, our results show that switching from single-use to reusable masks can significantly reduce plastic leakage and climate change impact<sup>14</sup>. However, analysis of the different scenarios shows considerable variation between reuse strategies, mainly due to the impact of production and recycling. A footprint reduction (GWP100 or UBP) of 50% to 90% can be achieved by switching from a single-use medical mask to a reusable solution. For plastic leakage, this reduction can be from 60% to 100%. At the population level, these differences are not negligible. We quantified how much CO<sub>2</sub>eq impact and plastic leakage would be avoided within a year in Switzerland if 10% of the entire population was to shift from single-use masks transported by boat (PP\_1) to either a wait and reuse strategy for the same masks (PP\_4) or home-made cotton masks from old fabric (COT\_2). Results are reported in Table 2, considering a Swiss population 8'606'033 in 2019 (source: Federal Statistical Office).

|                   | CO <sub>2</sub> eq impact avoided<br>[t CO <sub>2</sub> eq.] | Plastic leakage avoided<br>[t PL] |
|-------------------|--------------------------------------------------------------|-----------------------------------|
| shifting to PP_4  | 4'077                                                        | 17                                |
| shifting to COT_2 | 4'400                                                        | 19                                |

311

*Table 2. Environmental impact of a shift from the use of disposable masks to reuse strategies in 10% of the Swiss population.*

For an impact per passenger transport by aircraft (person.km) of 0.129 kgCO<sub>2</sub>eq (source: Reffnet.ch) and an average 1.5L plastic bottle weight of 32.6 g<sup>31</sup>, the uptake of the wait and reuse strategy for the medical masks (PP\_4) by 10% of the population would be equivalent to saving CO<sub>2</sub>eq emissions from 5'402 individual flights from Paris to New York and preventing 513'194 plastic bottles (1.5L)

1  
2  
3 318 from being littered. Similarly, the uptake of home-made cotton masks (COT\_2) by the same  
4  
5 319 population share would result in CO<sub>2</sub>eq emissions savings analogous to 5'830 individual air travels  
6  
7 320 from Paris to New York, and a plastic leakage avoided corresponding to 570'219 plastic bottles  
8  
9  
10 321 (1.5L).

11  
12 322 The environmental impact assessment conducted in this study has several limitations. Data on mask  
13  
14 323 composition, transport and end of life are from the European context. The transposition of these  
15  
16 324 results to other regions, in particular regions with a higher production capacity of medical masks and  
17  
18 325 less reliance on imports, would lead to a modification of the GWP100 and UBP impact. Furthermore,  
19  
20 326 in the absence of precise market distribution data, mask composition and production data were  
21  
22 327 based on typical examples and scenarios rather than statistical data. In practice, there is some  
23  
24 328 variability in manufacturing and shipping arrangements due to different suppliers. From the point of  
25  
26 329 view of the effectiveness of their individual or collective protection, masks are not all equal. The  
27  
28 330 comparison of their performance is not obvious because several parameters influence their  
29  
30 331 effectiveness (droplet penetration, aerosol penetration, fitting to the face, wettability...)<sup>16</sup> and only  
31  
32 332 medical masks as well as labelled community masks (e.g. AFNOR label) have minimum performance  
33  
34 333 requirements for some of these parameters while a high variability in performance is to be expected  
35  
36 334 among unlabelled community masks. We performed an uncertainty analysis based on low and high  
37  
38 335 values for the littering rate (ranging from 0.2% to 12%, with the medium value being set at 2%). We  
39  
40 336 have observed that the plastic leakage results would be changing proportionally to the leakage rate  
41  
42 337 factor between the medium value and the low or high value, but that the climate change or UBP  
43  
44 338 impact results would deviate from the medium case by around 1% or below. No other uncertainty  
45  
46 339 analysis was undertaken for this study.

47  
48 340 The filtration efficiency of the membrane as such has been investigated by several experimental  
49  
50 341 studies. Aydin et al. report filtration efficiencies for large droplets in the 100 µ- 1mm range of over  
51  
52 342 98% for surgical masks and 93-98% for unlabelled community masks of different materials (cotton,  
53  
54 343 polyester and silk)<sup>32</sup>. For finer particles, the performance of unlabelled community masks is however

1  
2  
3 344 lower. In the 10 $\mu$  range (PM<sub>10</sub>), Neupane et al. show a filtration efficiency of 94% for surgical masks  
4  
5 345 and 63% and 84% for community masks<sup>33</sup>. Systematic reviews of the laboratory results obtained so  
6  
7 346 far suggest that community masks have satisfactory filtration efficiency for large particles (e.g. >  
8  
9 347 5 $\mu$ m), but that they have only limited effectiveness against aerosols.  
10  
11  
12 348 However, the overall performance of the masks is not limited to filtration efficiency alone and will be  
13  
14 349 affected by leaks due to poor fitting to the face, but also by the way the masks are used. Wearing a  
15  
16 350 face mask in a community logic is moreover primarily intended as a collective protection (by  
17  
18 351 reducing the emission of the wearer), rather than an individual protection. This collective  
19  
20 352 effectiveness is difficult to quantify due to the complexity of exposure situations and the presence of  
21  
22 353 other contamination routes (e.g surface contamination). Randomized studies conducted previously  
23  
24 354 on the transmission of viral infections in the community, showed that wearing a mask provided  
25  
26 355 some protection in the most adherent individuals<sup>34</sup> or when mask use is accompanied by hand  
27  
28 356 hygiene measures and/or education on viral infections<sup>35 36</sup>.  
29  
30  
31  
32  
33 357 The use of medical masks with a wear and reuse strategy seems to be the most appropriate when  
34  
35 358 considering both environmental impact and effectiveness. Expectations, in terms of mask  
36  
37 359 performance, are generally fairly limited. However, face masks contribute to collective protection by  
38  
39 360 reducing droplet emissions and, to a lesser extent, aerosol emissions from infected wearers.  
40  
41  
42 361 However, the lack of minimum performance requirements for unlabelled community face masks,  
43  
44 362 makes this contribution uncertain. Standardized masks, which offer guarantees in terms of  
45  
46 363 performance and reproducibility, are therefore beneficial from this point of view.  
47  
48  
49 364 Labelled community masks are also an interesting alternative. Their environmental performance is  
50  
51 365 currently limited by the number of planned cycles of use, which requires frequent replacement. An  
52  
53 366 increase in the number of use cycles covered by the label would reduce significantly their  
54  
55 367 environmental impact. The future use of materials that are less polluting than plastic materials for  
56  
57 368 the manufacture of masks could be an alternative to reduce the environmental cost of their  
58  
59  
60

1  
2  
3 369 manufacture and plastic leakage. For community masks, this adjustment is relatively simple because  
4  
5 370 many of them are made of cotton and some manufacturers also offer masks made of recycled  
6  
7 371 plastic. For medical masks, a more important effort is necessary because it requires the complete  
8  
9 372 accreditation of the mask according to EN14683. Overall, our results highlight the need to develop  
10  
11 373 procedures and the legal/operational framework to extend the use of protective equipment during a  
12  
13 374 pandemic. Such an approach would not only reduce the environmental impact of the masks, but also  
14  
15 375 make the public health system more resilient in the event of equipment shortages. The scale of the  
16  
17 376 uptake of the reuse strategies suggested in the study by the population will depend on the interest  
18  
19 377 of the government to endorse such practices for community masks and on the efficiency of public  
20  
21 378 awareness campaign. Last but not least, adopting a wait and reuse strategy with medical masks is  
22  
23 379 probably the most economical, which is important in terms of access to protective measures for  
24  
25 380 people with limited financial resources<sup>37</sup>.

### 381 **Acknowledgments**

382 The authors would like to thank Prof. J. Cornuz from Unisanté, for his advice and ideas in the  
383 development of this study.

### 384 **Competing interests**

385 The authors declare no competing interest

### 386 **Author contribution**

387 JB, NS, BG, KS and DV developed the study concept and design. KS and DV conducted the literature  
388 review. AB and JB conducted the impact assessment and data analysis. All authors contributed to the  
389 data interpretation. DV wrote the first draft of the manuscript with contributions from JB, AB and  
390 NS. All authors contributed to and have approved the final manuscript.

### 391 **Funding**

392 The authors received no funding to perform this study.

### 393 **Patient consent for publication**

1  
2  
3 394 Not required  
4

5 395 **Data availability statement**  
6  
7

8 396 Detailed primary and secondary data used for this study are available upon request.  
9

10 397 **Ethics approval**  
11  
12

13 398 This study does not involve research with human subjects.  
14

15 399  
16

17 400  
18  
19  
20  
21  
22  
23  
24  
25  
26  
27  
28  
29  
30  
31  
32  
33  
34  
35  
36  
37  
38  
39  
40  
41  
42  
43  
44  
45  
46  
47  
48  
49  
50  
51  
52  
53  
54  
55  
56  
57  
58  
59  
60

For peer review only



401 **References**

- 402 1. Le Quéré C, Jackson RB, Jones MW, et al. Temporary reduction in daily global CO<sub>2</sub> emissions during  
403 the COVID-19 forced confinement. *Nature Climate Change* 2020;10(7):647-53. doi:  
404 10.1038/s41558-020-0797-x
- 405 2. Tollefson J. COVID curbed carbon emissions in 2020 - but not by much. *Nature* 2021;589(7842):343.  
406 doi: 10.1038/d41586-021-00090-3 [published Online First: 2021/01/17]
- 407 3. Patel PP, Mondal S, Ghosh KG. Some respite for India's dirtiest river? Examining the Yamuna's water  
408 quality at Delhi during the COVID-19 lockdown period. *Science of The Total Environment*  
409 2020;744:140851. doi: <https://doi.org/10.1016/j.scitotenv.2020.140851>
- 410 4. Almond D, Du X, Zhang S. Did COVID-19 improve air quality near hubei? . In: 2020 NBoER, ed.,  
411 2020.
- 412 5. Klemeš JJ, Fan YV, Jiang P. The energy and environmental footprints of COVID-19 fighting  
413 measures - PPE, disinfection, supply chains. *Energy (Oxf)* 2020;211:118701-01. doi:  
414 10.1016/j.energy.2020.118701 [published Online First: 2020/08/27]
- 415 6. Gillingham KT, Knittel CR, Li J, et al. The Short-run and Long-run Effects of Covid-19 on Energy and  
416 the Environment. *Joule* 2020;4(7):1337-41. doi: <https://doi.org/10.1016/j.joule.2020.06.010>
- 417 7. Benson NU, Basse DE, Palanisami T. COVID pollution: impact of COVID-19 pandemic on global  
418 plastic waste footprint. *Heliyon* 2021;7(2):e06343. doi:  
419 <https://doi.org/10.1016/j.heliyon.2021.e06343>
- 420 8. Patrício Silva AL, Prata JC, Walker TR, et al. Increased plastic pollution due to COVID-19 pandemic:  
421 Challenges and recommendations. *Chemical Engineering Journal* 2021;405:126683. doi:  
422 <https://doi.org/10.1016/j.cej.2020.126683>
- 423 9. Fadare OO, Okoffo ED. Covid-19 face masks: A potential source of microplastic fibers in the  
424 environment. *Science of The Total Environment* 2020;737:140279. doi:  
425 <https://doi.org/10.1016/j.scitotenv.2020.140279>
- 426 10. Aragaw TA. Surgical face masks as a potential source for microplastic pollution in the COVID-19  
427 scenario. *Mar Pollut Bull* 2020;159:111517-17. doi: 10.1016/j.marpolbul.2020.111517  
428 [published Online First: 2020/07/25]
- 429 11. Eurostat. Which country imported the most face masks? : EU Commission; 2021 [Available from:  
430 <https://ec.europa.eu/eurostat/en/web/products-eurostat-news/-/ddn-20201006-12021>.
- 431 12. Shruti VC, Pérez-Guevara F, Elizalde-Martínez I, et al. Reusable masks for COVID-19: A missing  
432 piece of the microplastic problem during the global health crisis. *Mar Pollut Bull*  
433 2020;161:111777. doi: <https://doi.org/10.1016/j.marpolbul.2020.111777>
- 434 13. Phelps Bondaroff T, Cooke S. Masks on the Beach: The impact of COVID-19 on marine plastic  
435 pollution. Gary Stokes ed: OceansAsia, 2020.
- 436 14. Allison AL, Ambrose-Dempster E, Domenech Aparsi T, et al. The impact and effectiveness of the  
437 general public wearing masks to reduce the spread of pandemics in the UK: a multidisciplinary  
438 comparison of single-use masks versus reusable face masks: UCL Press, 2020.
- 439 15. Klemeš JJ, Fan YV, Tan RR, et al. Minimising the present and future plastic waste, energy and  
440 environmental footprints related to COVID-19. *Renewable and Sustainable Energy Reviews*  
441 2020;127:109883. doi: <https://doi.org/10.1016/j.rser.2020.109883>
- 442 16. Brainard J, Jones NR, Lake IR, et al. Community use of face masks and similar barriers to prevent  
443 respiratory illness such as COVID-19: a rapid scoping review. *Euro surveillance : bulletin*  
444 *Europeen sur les maladies transmissibles = European communicable disease bulletin*  
445 2020;25(49) doi: 10.2807/1560-7917.es.2020.25.49.2000725 [published Online First:  
446 2020/12/12]
- 447 17. Chua MH, Cheng W, Goh SS, et al. Face Masks in the New COVID-19 Normal: Materials, Testing,  
448 and Perspectives. *Research* 2020;2020:7286735. doi: 10.34133/2020/7286735
- 449 18. Liao L, Xiao W, Zhao M, et al. Can N95 Respirators Be Reused after Disinfection? How Many  
450 Times? *ACS Nano* 2020;14(5):6348-56. doi: 10.1021/acsnano.0c03597 [published Online First:  
451 2020/05/06]
- 452 19. Pascoe MJ, Robertson A, Crayford A, et al. Dry heat and microwave generated steam protocols for  
453 the rapid decontamination of respiratory personal protective equipment in response to COVID-  
454 19-related shortages. *The Journal of hospital infection* 2020 doi: 10.1016/j.jhin.2020.07.008  
455 [published Online First: 2020/07/12]
- 456 20. Ou Q, Pei C, Chan Kim S, et al. Evaluation of decontamination methods for commercial and  
457 alternative respirator and mask materials - view from filtration aspect. *J Aerosol Sci*  
458 2020;150:105609-09. doi: 10.1016/j.jaerosci.2020.105609 [published Online First: 2020/06/24]

- 1  
2  
3 459 21. Chin A, Chu J, Perera M, et al. Stability of SARS-CoV-2 in different environmental conditions.  
4 460 *medRxiv* 2020:2020.03.15.20036673. doi: 10.1101/2020.03.15.20036673
- 5 461 22. AFNOR. Masques barrières - Guide d'exigences minimales, de méthodes d'essais, de confection  
6 462 et d'usage. Paris: AFNOR SPEC S76-001 version 1.10, 2020:45.
- 7 463 23. TESTEX. Factsheet - Community Masks Zurich: TESTEX AG; 2020 [updated January 2021].  
8 464 Available from: <https://www.testex.com/en/communitymask/>.
- 9 465 24. IPCC. Climate change. The Intergovernmental Panel on Climate Change, scientific assessment;  
10 466 Agriculture, Ecosystems & Environment. Cambridge: Cambridge University Press, 1990:339.
- 11 467 25. Boucher J, Billard G, Simeone E, et al. The marine plastic footprint : towards a science-based metric  
12 468 for measuring marine plastic leakage and increasing the materiality and circularity of plastic.  
13 469 Gland, Switzerland: IUCN, Global Marine and Polar Programme, 2020:70.
- 14 470 26. Jambeck JR, Geyer R, Wilcox C, et al. Plastic waste inputs from land into the ocean. *Science*  
15 471 2015;347(6223):768. doi: 10.1126/science.1260352
- 16 472 27. Boucher J, Faure F, Pompini O, et al. (Micro) plastic fluxes and stocks in Lake Geneva basin. *TrAC*  
17 473 *Trends in Analytical Chemistry* 2019;112:66-74. doi: <https://doi.org/10.1016/j.trac.2018.11.037>
- 18 474 28. ICF e. Assessment of measures to reduce marine litter from single use plastics. Luxembourg:  
19 475 European Commission, Directorate-General for Environment, 2018.
- 20 476 29. Bourrier C. Washing Machine - ETH Sustainability Summer School 2011 [Web archive]. Zurich:  
21 477 ETH; 2011 [Available from: [http://webarchiv.ethz.ch/sustainability-](http://webarchiv.ethz.ch/sustainability-v2/lehre/Sommerakademien/so2011/washies_report.pdf)  
22 478 [v2/lehre/Sommerakademien/so2011/washies\\_report.pdf](http://webarchiv.ethz.ch/sustainability-v2/lehre/Sommerakademien/so2011/washies_report.pdf)].
- 23 479 30. Reimann D. CEWEP Energy Report III: Results of Specific Data for Energy, R1 Plant Efficiency  
24 480 Factor and NCV of 314 European Waste-to-Energy (WtE) Plants. Bamberg, Germany: CEWEP,  
25 481 Confederation of European Waste-to-Energy Plants, 2012.
- 26 482 31. Islam M, Uddin MJ, Alshehri K. Plastic Waste and Carbon Footprint Generation Due to the  
27 483 Consumption of Bottled Waters in Saudi Arabia. *Research & Development in Material Science*  
28 484 2018;5 doi: 10.31031/RDMS.2018.05.000604
- 29 485 32. Aydin O, Emon B, Cheng S, et al. Performance of fabrics for home-made masks against the spread  
30 486 of COVID-19 through droplets: A quantitative mechanistic study. *Extreme Mechanics Letters*  
31 487 2020;40:100924. doi: 10.1016/j.eml.2020.100924 [published Online First: 2020/08/25]
- 32 488 33. Neupane BB, Mainali S, Sharma A, et al. Optical microscopic study of surface morphology and  
33 489 filtering efficiency of face masks. *PeerJ* 2019;7:e7142-e42. doi: 10.7717/peerj.7142
- 34 490 34. MacIntyre CR, Cauchemez S, Dwyer DE, et al. Face mask use and control of respiratory virus  
35 491 transmission in households. *Emerging infectious diseases* 2009;15(2):233-41. doi:  
36 492 10.3201/eid1502.081167
- 37 493 35. Aiello AE, Perez V, Coulborn RM, et al. Facemasks, hand hygiene, and influenza among young  
38 494 adults: a randomized intervention trial. *PloS one* 2012;7(1):e29744-e44. doi:  
39 495 10.1371/journal.pone.0029744 [published Online First: 2012/01/25]
- 40 496 36. Larson EL, Ferng YH, Wong-McLoughlin J, et al. Impact of non-pharmaceutical interventions on  
41 497 URIs and influenza in crowded, urban households. *Public health reports (Washington, DC :  
42 498 1974)* 2010;125(2):178-91. doi: 10.1177/003335491012500206 [published Online First:  
43 499 2010/03/20]
- 44 500 37. Siu JY. Health inequality experienced by the socially disadvantaged populations during the outbreak  
45 501 of COVID-19 in Hong Kong: An interaction with social inequality. *Health & social care in the  
46 502 community* 2020 doi: 10.1111/hsc.13214 [published Online First: 2020/10/31]
- 47 503  
48 504  
49 505  
50 506  
51 507  
52  
53  
54  
55  
56  
57  
58  
59  
60

1  
2  
3  
4  
5  
6  
7  
8  
9  
10  
11  
12  
13  
14  
15  
16  
17  
18  
19  
20  
21  
22  
23  
24  
25  
26  
27  
28  
29  
30  
31  
32  
33  
34  
35  
36  
37  
38  
39  
40  
41  
42  
43  
44  
45  
46  
47  
48  
49  
50  
51  
52  
53  
54  
55  
56  
57  
58  
59  
60

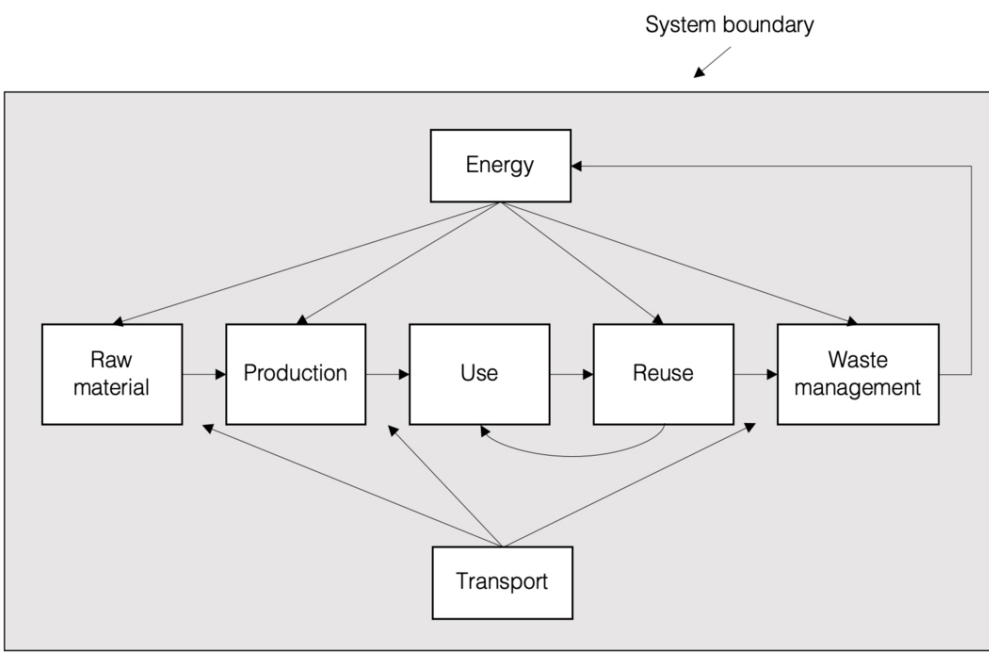

Figure 1. Illustration of the system boundary for all scenarios involved in the study.

89x89mm (300 x 300 DPI)

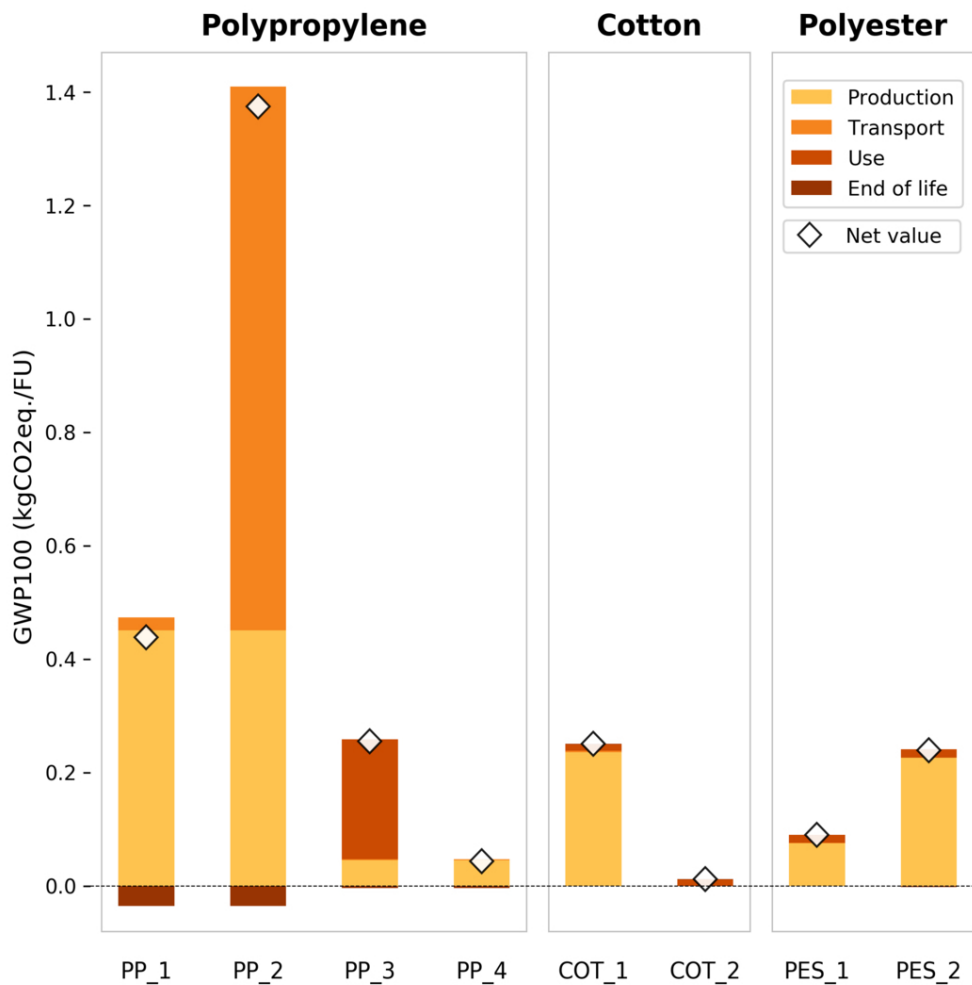

Figure 2. Footprint expressed in GWP100 (kg CO2 eq./FU) for different scenario of mask uses.

89x89mm (300 x 300 DPI)

1  
2  
3  
4  
5  
6  
7  
8  
9  
10  
11  
12  
13  
14  
15  
16  
17  
18  
19  
20  
21  
22  
23  
24  
25  
26  
27  
28  
29  
30  
31  
32  
33  
34  
35  
36  
37  
38  
39  
40  
41  
42  
43  
44  
45  
46  
47  
48  
49  
50  
51  
52  
53  
54  
55  
56  
57  
58  
59  
60

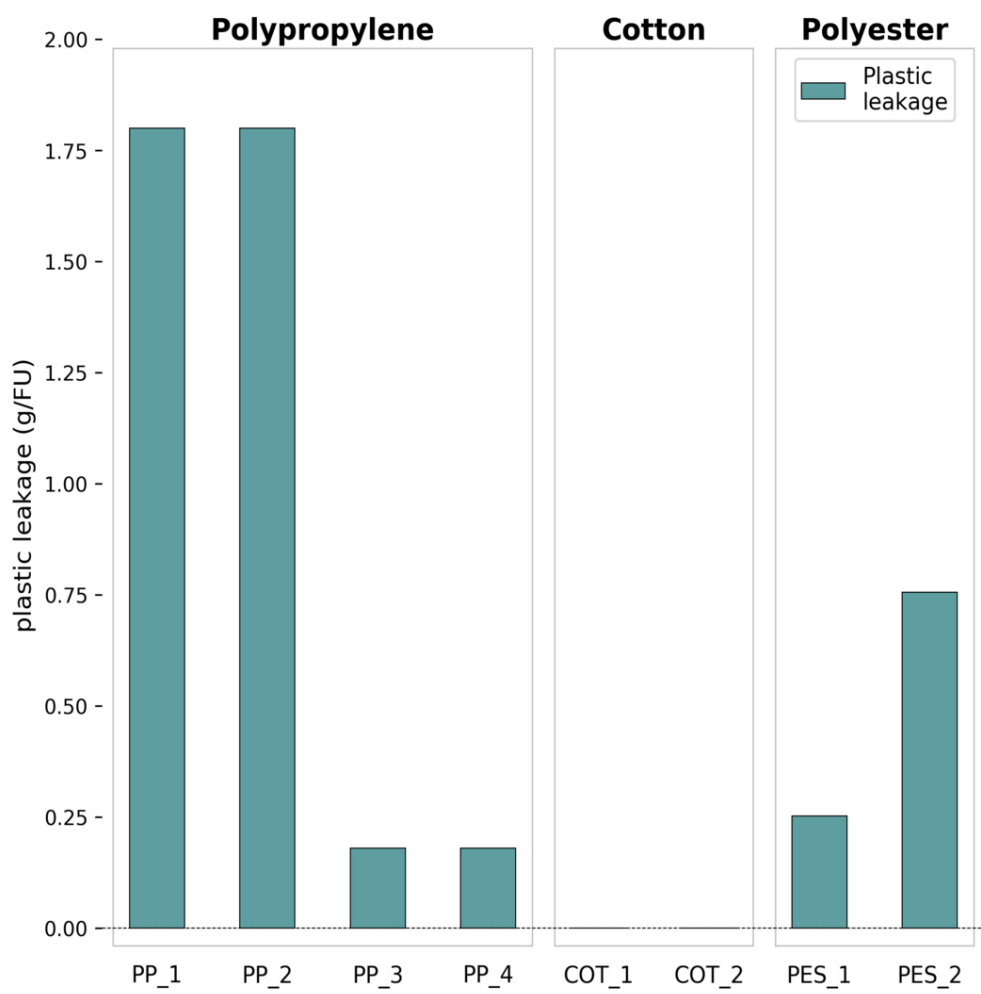

Figure 3. Footprint expressed in plastic leakage (g/FU) for different scenarios of mask uses.  
89x89mm (300 x 300 DPI)

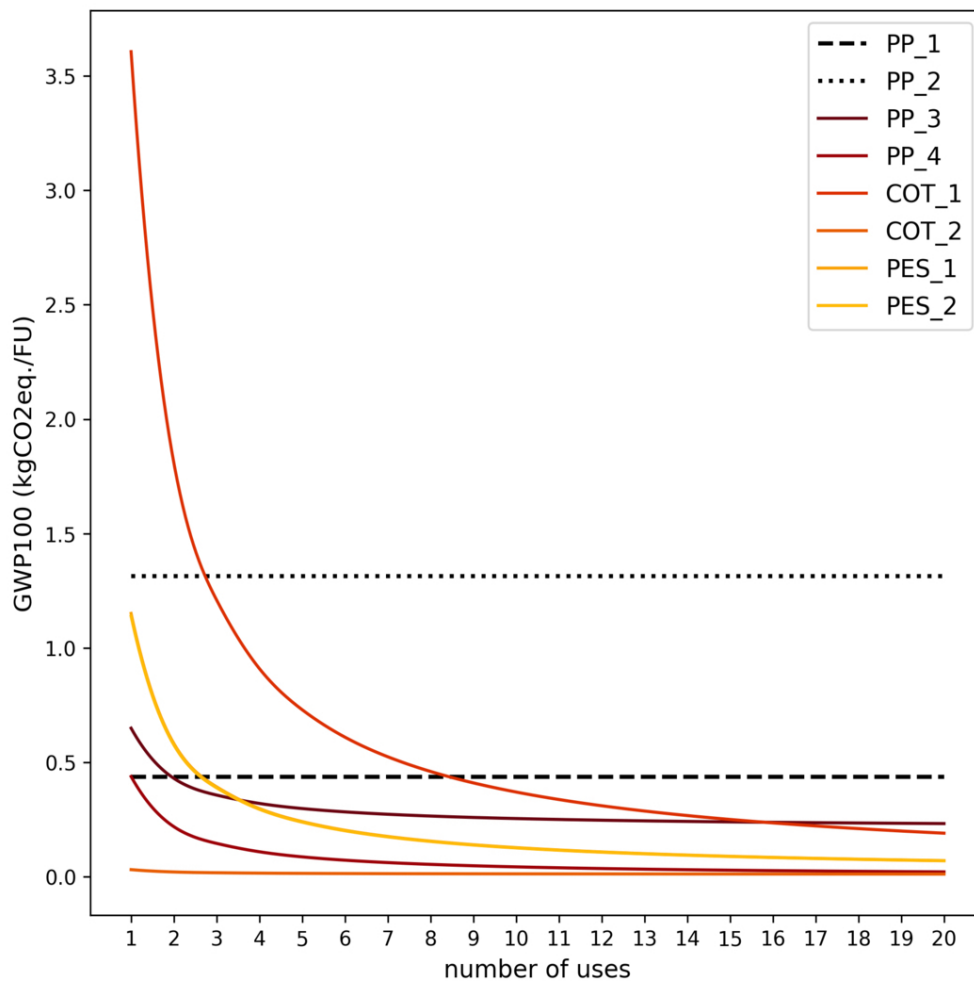

Figure 4. Footprint expressed in GWP100 (kgCO<sub>2</sub>eq./FU) for different scenarios as a function of number of uses.

89x89mm (300 x 300 DPI)

## Appendix S1

In addition to the Global Warming Potential (GWP100) index, we assessed other environmental impacts with an aggregated impact metric specific to Switzerland called UBP, which is the abbreviation of the German word “Umweltbelastungspunkte”. The UBP method aggregates all individual impacts from a standard LCA assessment into a single parameter. It is based on legally defined targets for pollutant emissions and resource consumption, and measures the differences between current emission values and these specific target values. The further the current status is from the target, the greater the number of points assigned to an emission. For more details, see Frischknecht et al. (Frischknecht and Büsler Knöpfel 2013).

The UBP impacts of the different scenarios of mask use are presented in Figure S1. Similarly to the CO<sub>2</sub>-equivalent impacts (see Figure 1), the use of disposable masks brought by plane (scenario PP\_2) results in the highest impact in terms of UBP. The largest discrepancies between the global warming potential and UBP results occur in scenarios PP\_3 and COT\_1. In scenario PP\_3, the UBP impact of the use phase is very large with an unfavourable contribution of the electricity consumption to run the oven, while the production phase of the cotton fabric increases the relative impact of cotton masks manufactured abroad (scenario COT\_1) with respect to other scenarios when compared with the global warming potential results. Nonetheless, the least impactful scenarios remain the home-made cotton masks (COT\_2) and the extended use of medical masks through a wait and reuse strategy (PP\_4), which provides a coherent picture when it comes to the best practices for community protection with a mask in times of pandemic.

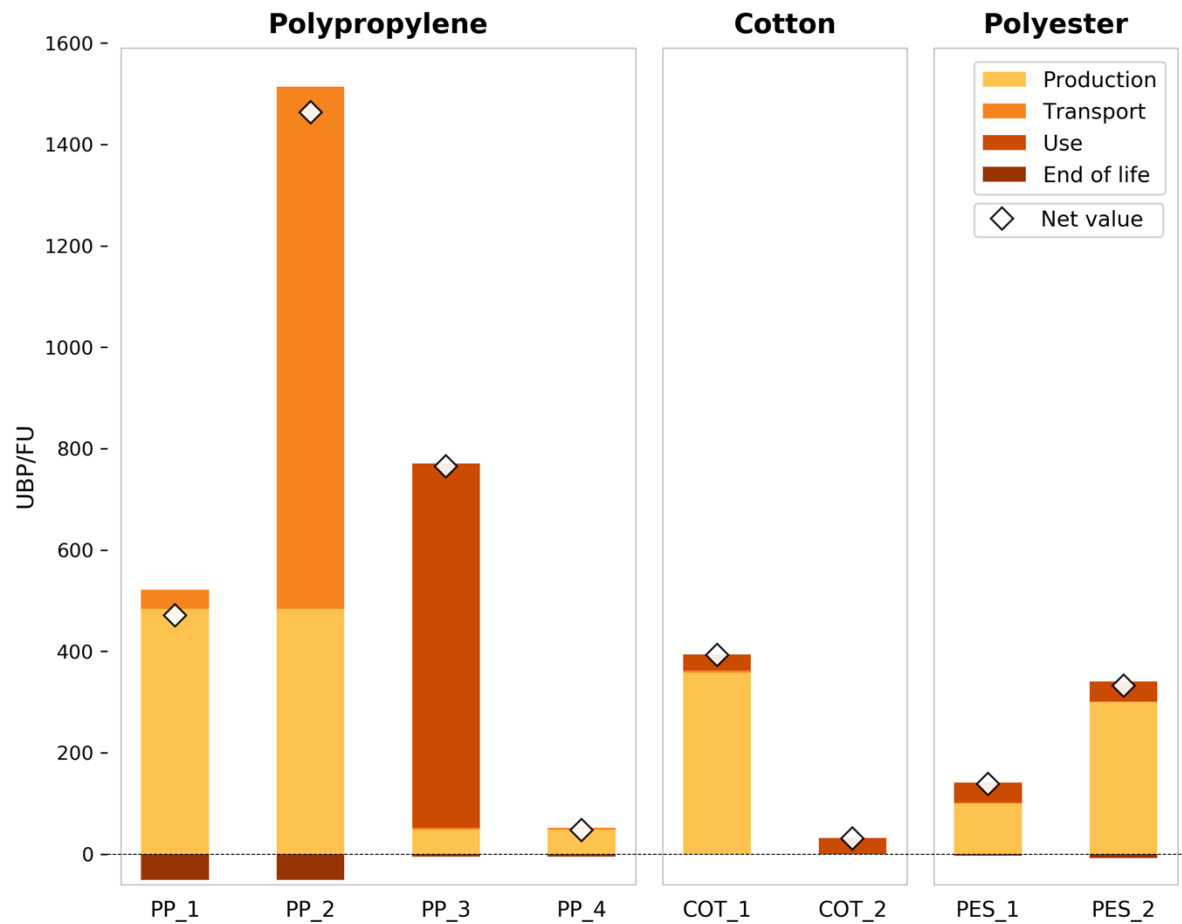

Figure S1. Footprint expressed in UBP /FU for different scenario of mask uses.

Frischknecht, Rolf, and Sybille Büsser Knöpfel. 2013. "Swiss Eco-Factors 2013 according to the Ecological Scarcity Method. Methodological fundamentals and their application in Switzerland." In *Environmental studies* no. 1330, 254. Bern: Federal Office for the Environment.



# BMJ Open

## Which strategy for using medical and community masks? A prospective analysis of their environmental impact.

|                                 |                                                                                                                                                                                                                                                                                                                                                                                                               |
|---------------------------------|---------------------------------------------------------------------------------------------------------------------------------------------------------------------------------------------------------------------------------------------------------------------------------------------------------------------------------------------------------------------------------------------------------------|
| Journal:                        | <i>BMJ Open</i>                                                                                                                                                                                                                                                                                                                                                                                               |
| Manuscript ID                   | bmjopen-2021-049690.R2                                                                                                                                                                                                                                                                                                                                                                                        |
| Article Type:                   | Original research                                                                                                                                                                                                                                                                                                                                                                                             |
| Date Submitted by the Author:   | 11-Aug-2021                                                                                                                                                                                                                                                                                                                                                                                                   |
| Complete List of Authors:       | Bouchet, Alexandre; EA - Environmental action<br>Boucher, Julien; EA – environmental action; University of Applied Sciences and Arts Western Switzerland<br>Schutzbach, Kevin; Center for Primary Care and Public Health<br>Senn, Nicolas; Center for Primary Care and Public Health<br>Genton, Blaise; Center for Primary Care and Public Health<br>Vernez, David; Center for Primary Care and Public Health |
| <b>Primary Subject Heading</b>: | Public health                                                                                                                                                                                                                                                                                                                                                                                                 |
| Secondary Subject Heading:      | Health policy                                                                                                                                                                                                                                                                                                                                                                                                 |
| Keywords:                       | COVID-19, PUBLIC HEALTH, Health & safety < HEALTH SERVICES ADMINISTRATION & MANAGEMENT                                                                                                                                                                                                                                                                                                                        |
|                                 |                                                                                                                                                                                                                                                                                                                                                                                                               |

SCHOLARONE™  
Manuscripts



I, the Submitting Author has the right to grant and does grant on behalf of all authors of the Work (as defined in the below author licence), an exclusive licence and/or a non-exclusive licence for contributions from authors who are: i) UK Crown employees; ii) where BMJ has agreed a CC-BY licence shall apply, and/or iii) in accordance with the terms applicable for US Federal Government officers or employees acting as part of their official duties; on a worldwide, perpetual, irrevocable, royalty-free basis to BMJ Publishing Group Ltd ("BMJ") its licensees and where the relevant Journal is co-owned by BMJ to the co-owners of the Journal, to publish the Work in this journal and any other BMJ products and to exploit all rights, as set out in our [licence](#).

The Submitting Author accepts and understands that any supply made under these terms is made by BMJ to the Submitting Author unless you are acting as an employee on behalf of your employer or a postgraduate student of an affiliated institution which is paying any applicable article publishing charge ("APC") for Open Access articles. Where the Submitting Author wishes to make the Work available on an Open Access basis (and intends to pay the relevant APC), the terms of reuse of such Open Access shall be governed by a Creative Commons licence – details of these licences and which [Creative Commons](#) licence will apply to this Work are set out in our licence referred to above.

Other than as permitted in any relevant BMJ Author's Self Archiving Policies, I confirm this Work has not been accepted for publication elsewhere, is not being considered for publication elsewhere and does not duplicate material already published. I confirm all authors consent to publication of this Work and authorise the granting of this licence.

1  
2  
3  
4 1 **Which strategy for using medical and community masks? A**  
5  
6 2 **prospective analysis of their environmental impact.**  
7

8 3 Alexandre Bouchet<sup>1</sup>, Julien Boucher<sup>1,2</sup>, Kevin Schutzbach<sup>3</sup>, Nicolas Senn<sup>3</sup>, Blaise Genton<sup>3</sup>, David  
9 4 Vernez<sup>3</sup>

10 5 <sup>1</sup> EA – environmental action, research consultancy, Lausanne, Switzerland

11 6 <sup>2</sup> University of Applied Sciences and Arts Western Switzerland // HES-SO, HEIG-VD, Yverdon-les-  
12 7 Bains, Switzerland

13 8 <sup>3</sup> Department of Occupational Health and Environment, Center for Primary Care and Public Health  
14 9 (Unisanté), University of Lausanne, CH-1066 Epalinges, Switzerland

15 10

16 11 **Corresponding author**

17 12 Prof. David Vernez

18 13 David.Vernez@unisante.ch

19 14 Phone: 0041 21 314 74 51

20 15 ORCID: 0000-0002-3304-8727

21 16

22 17 [alexandre.bouchet@shaping-ea.com](mailto:alexandre.bouchet@shaping-ea.com); [julien.boucher@shaping-ea.com](mailto:julien.boucher@shaping-ea.com); [kevin.schutzbach@chuv.ch](mailto:kevin.schutzbach@chuv.ch);  
23 18 [nicolas.senn@unisante.ch](mailto:nicolas.senn@unisante.ch); [blaise.genton@unisante.ch](mailto:blaise.genton@unisante.ch); [david.vernez@unisante.ch](mailto:david.vernez@unisante.ch)

24 19

25 20

26 21

27 22 **Word count:** 3501 (without abstract and references)

28 23

29 24

30 25 **Keywords:**

31 26 Facemask, community mask, medical mask, recycling, reuse, carbon footprint, COVID-19

32 27

33 28

34 29

35 30

36 31

37 32

38 33

39 34

40 35

41 36

42 37

## 29 **Abstract**

### 30 **Introduction**

31 The use of personal protective equipment, especially medical masks, increased dramatically during  
32 the COVID-19 crisis. Medical masks are made of synthetic materials, mainly polypropylene, and a  
33 majority of them are produced in China and imported to the European market. The urgency of the  
34 need has so far prevailed over environmental considerations.

### 35 **Objective**

36 Assess the environmental impact of different strategies for the use of facemask

### 37 **Method**

38 A prospective analysis was conducted to assess the environmental impact of different strategies for  
39 the use of medical and community masks. 8 scenarios, differentiating the typologies of masks and the  
40 modes of reuse are compared using three environmental impact indicators: the Global Warming  
41 Potential (GWP100), the ecological scarcity (UBP method) and the plastic leakage (PL). This study  
42 attempts to provide clear recommendations that consider both the environmental impact and the  
43 protective effectiveness of face masks used in the community.

### 44 **Results**

45 The environmental impact of single-use masks is the most unfavorable, with a GWP of 0.4 -1.3 kgCO<sub>2</sub>  
46 eq., depending on the transport scenario, and a PL of 1.8 g, for a one month protection against COVID-  
47 19. The use of home-made cotton masks and prolonged use of medical masks through wait-and-reuse  
48 are the scenarios with the lowest impact.

### 49 **Conclusion**

50 The use of medical masks with a wait and reuse strategy seems to be the most appropriate when  
51 considering both environmental impact and effectiveness. Our results also highlight the need to  
52 develop procedures and the legal/operational framework to extend the use of protective equipment  
53 during a pandemic.

1  
2  
3 54 **Strengths and limitations of this study**  
4  
5  
6 55  
7  
8 56 - This study provides an environmental assessment based on three indicators (GWP 100, UBP,  
9  
10 57 plastic leakage) for different mask type and use strategies.  
11  
12  
13 58 - -Eight mask use and reuse strategies were considered.  
14  
15 59 - - The assumptions used in the life cycle assessment (transport, end of life, littering) are  
16  
17 60 based on the European context and do not necessarily apply to other regions.  
18  
19  
20 61 - The weight and composition of the masks used in this study are those of typical,  
21  
22 62 commercially available masks, but do not represent the variability from one manufacturer to  
23  
24 63 another.  
25  
26  
27 64  
28  
29  
30  
31  
32  
33  
34  
35  
36  
37  
38  
39  
40  
41  
42  
43  
44  
45  
46  
47  
48  
49  
50  
51  
52  
53  
54  
55  
56  
57  
58  
59  
60

## 65 Introduction

66 The decrease in industrial activity during the COVID-19 confinement and the decline in intra-  
67 and inter-national mobility has led to a significant drop in CO<sub>2</sub> emissions<sup>1</sup>. An average  
68 decrease of 6.4% in yearly CO<sub>2</sub> emissions was observed worldwide for 2020<sup>2</sup>. Positive effects  
69 have also been observed on other air pollutants, such as PM, NO<sub>x</sub>, SO<sub>2</sub> and on river pollution<sup>3</sup>.  
70 However, some observations made in China, near Hubei's epicenter, show an unclear  
71 environmental picture, with a lower decrease in air pollutants than expected<sup>4</sup>. Due to the  
72 temporary nature of the confinement measures, some authors argue that the longer-term  
73 effects of the COVID-19 crisis on the environmental footprint of human activities remain  
74 highly uncertain and may offset the observed short-term environmental benefits<sup>5</sup>. In the  
75 United States, a sharp drop in jet fuel and gasoline consumption has been observed during  
76 the crisis, leading to a decrease in CO<sub>2</sub> emissions of around 15%. However, it has been  
77 estimated that in a scenario of sustainable impact on the economy, the consequences of  
78 delayed investment in green energy and traffic-related emission reduction programs alone  
79 could outweigh the short-term effects<sup>6</sup>. The evolution of some activities or consumption  
80 patterns during the COVID-19 crisis are also likely to worsen the environmental balance:  
81 development of e-commerce (increase of transport distances and packaging), high  
82 consumption of disinfection products, massive COVID-19 screening in populations (increase  
83 in medical consumables).  
84 The consumption of protective equipment and most particularly facemasks has also  
85 experienced a sharp increase during the crisis<sup>7 8</sup>. To meet the growing demand, the  
86 production of disposable masks has dramatically increased since the first pandemic wave<sup>9</sup>.  
87 By June 2020, China was producing 200 million facemasks per day, 20 times more than in

1  
2  
3 88 February of the same year<sup>10</sup>. With the second pandemic wave, the wearing of facemasks was  
4  
5 89 mandatory in closed spaces and densely populated areas in many countries. Medical masks  
6  
7  
8 90 and community masks have become essential tools in the fight against the spread of the virus.  
9  
10 91 Given the extensive use of facemasks, there is an urgent need to take into account the  
11  
12 92 environmental impact of this practice and ways to extend the life of this equipment. Several  
13  
14 93 arguments can be put forward: (1) the bulk of production comes from Asia<sup>11</sup>, resulting in  
15  
16 94 significant use of transportation to supply regions such as Europe and the United States, (2)  
17  
18 95 medical masks are intended for single use, resulting in additional waste and possible littering  
19  
20 96 of used masks, and (3) medical masks and some community masks are made of plastic. Poor  
21  
22 97 management of this waste can therefore contribute to the presence of macroplastics and  
23  
24 98 microplastics in the environment, particularly in the Ocean<sup>12</sup>. Considering that 3% of masks  
25  
26 99 could enter the environment (overall loss rate), it is estimated that up to 1.56 billions  
27  
28 100 disposable masks could have entered the Ocean in 2020, which represents between 4680 and  
29  
30 101 6240 tons of plastic pollution to the marine environment<sup>13</sup>. Life cycle assessment (LCA)  
31  
32 102 conducted on facemasks in United Kingdom also shows that the environmental impact of  
33  
34 103 disposable masks are generally higher than recycled masks. In the absence of recycling, the  
35  
36 104 production of waste in this country, as a consequence of the use of one mask each day for a  
37  
38 105 year by the entire British population, was estimated at 124'000 tons, including 66'000 tons of  
39  
40 106 non-recyclable contaminated plastic<sup>14</sup>. Many countries are attempting to restrict the use of  
41  
42 107 single-use plastics, including restricting the use of plastic bags. The increase in plastic waste  
43  
44 108 is putting pressure on the waste management system to find new strategies to deal with this  
45  
46 109 change<sup>15</sup>. On the other hand, there is good evidence that face masks used in the community  
47  
48 110 provide protection against Covid-19 infections<sup>16</sup>, even though effectiveness can be very  
49  
50  
51  
52  
53  
54  
55  
56  
57  
58  
59  
60

1  
2  
3 111 different according to the type of masks, the wearing adherence or the environmental  
4  
5  
6 112 parameters (e.g. humidity and heat).  
7

8 113 In this study, we aim to explore and compare the environmental impact of the different masks  
9  
10 114 used in the community and attempt to provide clear recommendations on the best  
11  
12  
13 115 compromise between protection effectiveness and environmental impact.  
14

15 116  
16

17 117  
18

19 118  
20

21 119  
22  
23  
24  
25  
26  
27  
28  
29  
30  
31  
32  
33  
34  
35  
36  
37  
38  
39  
40  
41  
42  
43  
44  
45  
46  
47  
48  
49  
50  
51  
52  
53  
54  
55  
56  
57  
58  
59  
60

For peer review only



## 120 **Method**

121 The environmental impact assessment proposed in this study is based on: (1) the construction of  
122 scenarios of mask use in the general population, distinguishing their typology and modalities of reuse,  
123 and (2) the analysis of these scenarios using three impact indicators, reflecting global warming, plastic  
124 littering and ecological scarcity (UBP method).

### 125 **Mask typology**

126 Three types of masks, intended for general public use, were considered: medical masks, community  
127 masks and labelled community masks. Filtering facepiece respirators, such as N95 (US) and FFP2 (EU),  
128 which are mainly used by healthcare professionals are not considered in this study.

129 Medical masks (or surgical masks) are originally intended for single use and designed to protect  
130 patients from possible pathogens exhaled by the medical personnel. In the context of the COVID-19  
131 pandemic, these masks have been widely used outside of healthcare settings to protect the public by  
132 preventing pathogens from leaving the wearer and thus from being transmitted to others in the  
133 vicinity of the wearer. In Europe, medical masks must meet the requirements of EN 14683 and must  
134 comply with the Medical Devices Directive (EU) 2017/745. Medical masks are usually constituted of 3  
135 different layers of nonwoven fabric, generally in polypropylene (referred here below as PP masks)<sup>17</sup>.

136 A majority of them are produced in China and imported by ship in large quantities on the European  
137 market. However, during the first pandemic wave in spring 2020, due to the lack of Filtering Facepiece  
138 Respirators and medical masks, emergency shipments were made by air.

139 The term community mask encompasses all non-professional masks that are intended to protect the  
140 general public from infection, essentially in reducing the emissions from the wearer (source control).

141 Community masks range from homemade cotton masks (referred here below as COT masks) to more  
142 or less sophisticated textile masks. Community masks have the advantage that they can be produced  
143 locally, either centrally in the case of commercial masks, or at home for personal use. The performance  
144 of community masks is not subject to legal requirements, so their quality can vary greatly. In some

1  
2  
3 145 countries, quality labels have been proposed, allowing minimum performance requirements to be  
4  
5 146 defined on a voluntary basis. This is the case, for instance, of the French AFNOR label and of the Swiss  
6  
7 147 TESTEX label (referred here below as PES masks). Currently, labelled masks represent only a minority  
8  
9 148 of production, probably due to higher manufacturing costs. While "common" community masks are  
10  
11 149 generally made of cotton or other textiles of natural origin, labelled masks, which require greater  
12  
13 150 technicality, are made of polymers, such as elastane or polyester. Community trade masks without  
14  
15 151 labels were considered to come from the wider European market. For the labelled masks, the origin  
16  
17 152 is more specific, since the AFNOR and TESTEX labelled masks are, to our knowledge, only produced in  
18  
19 153 France and Switzerland respectively.  
20  
21  
22

23 154

### 25 155 **Reuse strategy**

27 156 The lack of protective means and the need to extend the life cycle of masks during the first COVID-19  
28  
29 157 wave generated numerous studies on their reuse. Although medical masks are normally intended for  
30  
31 158 single use, it has been shown that certain physical treatments such as UVC, microwaves or dry heat  
32  
33 159 can effectively decontaminate them without significantly altering their barrier capacity. The latter  
34  
35 160 method is of particular interest for the treatment of medical masks, as it is accessible in all households.  
36  
37 161 It has been shown exposure to at least 70°C for 30 min is sufficient to effectively decontaminate  
38  
39 162 surgical masks or respirators<sup>18-20</sup>.  
40  
41  
42

43 163 Another alternative, which has yet to be validated, is the wait & reuse strategy. The viability of the  
44  
45 164 virus deposited on a surface decreases significantly after a few hours. Tests on surgical masks have  
46  
47 165 shown that under ambient temperature and humidity conditions (22°C, 65% RH), a 3-log reduction in  
48  
49 166 virus load was achieved after 4 to 7 days<sup>21</sup>. In a similar way to what has been proposed by the  
50  
51 167 N95Decon scientific group for respirators, surgical masks could therefore be stored at room  
52  
53 168 temperature for 7 days before being reused (by the same user).  
54  
55  
56  
57  
58  
59  
60

1  
2  
3 169 The situation with community masks is more straightforward since they are designed with the intent  
4  
5 170 of cleaning and reusing by the general public. The issue of maintaining performance is also less critical  
6  
7 171 since there are no legal requirements for this type of mask. The strategy considered here is therefore  
8  
9 172 that of a reuse after a decontamination at home in a washing machine at 60°C. Labelled community  
10  
11 173 mask are a special situation, since maintaining their performances is conditioned by the limitation of  
12  
13 174 the number of washing cycles, to 20 and 5 washes for the AFNOR and TESTEX labels, respectively <sup>22</sup><sup>23</sup>.  
14  
15  
16  
17  
18

175

### 19 176 **Environmental Impact assessment**

20 177

21 178

Figure 1 about here

22 179

23  
24  
25  
26  
27  
28 180 This study follows the methodology of life cycle assessment (LCA) and considers all the life cycle stages  
29  
30 181 of the different masks including production, transport, use (decontamination) and end of life (see  
31  
32 182 Figure 1). The primary data sources used and hypothesis are referenced throughout this article. The  
33  
34 183 secondary data used for impact characterization used to perform the LCA analysis are based on the  
35  
36 184 Ecoinvent database (<https://www.ecoinvent.org/database/database.html>). A proprietary excel tool  
37  
38 185 developed by the authors was used to perform the LCA based on Ecoinvent datasets. Unless otherwise  
39  
40 186 mentioned; the functional unit (FU) chosen for the comparison of the masks is “to equip one person  
41  
42 187 with a mask during a month”. Several environmental impact indicators were considered:  
43  
44  
45

46 188

- 47  
48 189 - The Global Warming Potential (GWP100) index, which expresses the impact of manufacturing,  
49  
50 190 transporting and recycling masks in terms of greenhouse gases. GWP100 expresses the time-  
51  
52 191 integrated warming effect, over a 100 year period, due to the release of a given greenhouse gas  
53  
54 192 in today's atmosphere, relative to that of carbon dioxide (in mass unit kg)<sup>24</sup>.  
55  
56  
57  
58  
59  
60

1  
2  
3 193 - The UBP method relies on the methodological concept of ecological scarcity and expresses the  
4  
5 194 environmental impact in terms of eco-points. It encompasses for instance the water footprint of  
6  
7 195 cotton production as well as the biodiversity impact of energy production during the use phase.  
8  
9  
10 196 However. Calculation using the UBP method has been performed and is available in Appendix  
11  
12 197 S1.

13  
14 198 - The plastic leakage (PL), which expresses the amount of plastic leaving the technosphere and  
15  
16 199 cumulating in the natural environment. PL measures the quantity of plastic ultimately released  
17  
18 200 into the ocean or into the other compartments (freshwater, soils, other terrestrial  
19  
20 201 environments) including both microplastics and macroplastics<sup>25</sup>. Plastic leakage is a result of  
21  
22 202 both loss and release and can be simply described by the following equation:

$$\begin{aligned} \text{Plastic leakage mass} &= \text{Plastic waste mass} \cdot \text{Leakage rate (with Leakage rate = Loss} \\ &\text{rate} \cdot \text{Release rate, and Loss rate = mismanaged rate + littering rate)} \end{aligned}$$

23  
24  
25 203  
26  
27 204  
28  
29 205 In the case of Switzerland, the only loss occurring is related to littering since the mismanaged  
30  
31 206 rate is equal to 0%. The littering rate will then be assimilated to the leakage rate as we are here  
32  
33 207 assessing the release rate of a low residual value item to all environmental compartments at  
34  
35 208 once, hence equal to 100%. The littering rate used by default for on-the-go plastic is generally  
36  
37 209 ranging between 2%<sup>26,27</sup> and 12%<sup>28</sup>. A recent study focusing on masks articulates a littering rate  
38  
39 210 of 3% worldwide. We used a 2% littering rate<sup>25</sup>, yielding a leakage rate of 2% to all  
40  
41 211 compartments of the environment for the scope of this study.

42  
43  
44 212 The destination chosen for masks transport is Switzerland. However, shipping origin and method  
45  
46 213 vary as masks can come from Switzerland, France or China, and be transported either by truck, boat  
47  
48 214 or plane. Different assumptions are made for additional environmental burdens during the use  
49  
50 215 phase of the mask life cycle according to the decontamination method. For the decontamination in  
51  
52 216 a washing machine, we consider a household washing machine cycle running at 60°C during 1h40  
53  
54 217 with a dry load of 6 kg of clothes with an energy use of 1.8 kWh/cycle, a water use of 67.6 L/cycle

1  
2  
3 218 and a soap consumption of 65 g/cycle<sup>29</sup>. We have allocated the energy, water and soap used to  
4  
5 219 wash a mask based on the ratio between the weight of the mask and the total dry load of clothes  
6  
7 220 assumed when running one cycle. These consumptions features have then been scaled up to  
8  
9 221 represent the functional unit chosen for the study. For the oven sterilization we assume that, based  
10  
11 222 on personal measurement, an oven running at 70°C during 30 min consumes 0.345 kWh of  
12  
13 223 electricity. As the oven utilization is exclusively dedicated to sterilizing masks, we had to make an  
14  
15 224 assumption on the number of masks being sterilized at once. We assumed that a batch of 5 masks  
16  
17 225 were sterilized for each oven utilization, hence an energy consumption of 0.069 kWh per mask  
18  
19 226 sterilized.  
20  
21  
22  
23 227 In the end of life stage, we assumed that all masks were incinerated after disposal. Heat and  
24  
25 228 electricity recovery efficiencies in Europe vary quite significantly between different plants, at  
26  
27 229 average values of 31% for heat and 12% for electricity<sup>30</sup>. The strategies for using the masks and the  
28  
29 230 corresponding assessment parameters are summarized in Table 1.  
30  
31  
32  
33  
34  
35  
36  
37  
38  
39  
40  
41  
42  
43  
44  
45  
46  
47  
48  
49  
50  
51  
52  
53  
54  
55  
56  
57  
58  
59  
60

### 232 **Patient and public involvement**

233 No patient involved.  
234  
235

236

| Scenario | Mask type                            | Material                                           | Weight [g]        | Origin                | Transport (main) | Re-use                   | Consumption mask/month <sup>a</sup> |
|----------|--------------------------------------|----------------------------------------------------|-------------------|-----------------------|------------------|--------------------------|-------------------------------------|
| PP_1     | Medical mask                         | Polypropylene (PP) / Nylon /Aluminium <sup>b</sup> | 3.2 (2.5/0.5/0.2) | China                 | Boat             | No                       | 30                                  |
| PP_2     |                                      | Polypropylene (PP) / Nylon /Aluminium              | 3.2 (2.5/0.5/0.2) | China                 | Plane            | No                       | 30                                  |
| PP_3     |                                      | Polypropylene (PP) / Nylon /Aluminium              | 3.2 (2.5/0.5/0.2) | China                 | Boat             | Hot drying, 30 min. 70°C | 3                                   |
| PP_4     |                                      | Polypropylene (PP) / Nylon /Aluminium              | 3.2 (2.5/0.5/0.2) | China                 | Boat             | Wait and reuse           | 3 <sup>c</sup>                      |
| COT_1    | Unlabelled community mask            | Cotton (COT)                                       | 5                 | China                 | Boat             | Washing machine 60°C     | 2                                   |
| COT_2    |                                      | Cotton (COT)                                       | 5                 | Homemade <sup>d</sup> | -                | Washing machine 60°C     | 2                                   |
| PES_1    | Labelled community mask <sup>e</sup> | Elastane / polyester (PES)                         | 6.3 (0.13/6.17)   | France                | Truck            | Washing machine 60°      | 2                                   |
| PES_2    |                                      | Elastane / polyester (PES)                         | 6.3 (0.13/6.17)   | Switzerland           | Truck            | Washing machine 60°      | 6                                   |

237

238 <sup>a</sup> Number of worn-out masks disposed of and then replaced by a user during a month (consumption = 30/nb. of expected reuses)

239 <sup>a</sup> Aluminium nose strip

240 <sup>c</sup> One mask is used each weekday, for 10 reuses

241 <sup>d</sup> made from old cloth/fabric

242 <sup>e</sup> Considering the French quality label AFNOR (scenario PES\_1) and the Swiss quality label Testex (scenario PES\_2)

243

244 *Table 1. Summary of Mask typology and uses scenarios*

## 245 Results

### 246 Global warming potential

247 The CO<sub>2</sub>- equivalent impact of the different scenarios of mask use is presented in Figure 2. The use of  
248 disposable masks brought by plane (scenario PP\_2), as experienced during the Personal Protective  
249 Equipment (PPE) shortage of the first pandemic wave, is by far the most detrimental with 1.3 kg/CO<sub>2</sub>  
250 eq./FU. Without taking this extreme situation into account, a strong variability is observed between  
251 the different scenarios of mask use. There is a factor of 30 between the most unfavourable scenario  
252 (PP\_1 - disposable medical mask brought by boat) and the most favourable scenario (COT\_2 – Home-  
253 made washable cotton mask). The differences observed are largely due to the absence of  
254 manufacturing impact from the second-hand fabric as well as a very low contribution from the usage  
255 phase in scenario COT\_2. The decontamination of medical masks by heating (PP\_3) is not very  
256 advantageous, as well as the use of community masks made of polymers, as long as the number of  
257 reuse cycles remains limited. Taking into account the discounted emissions from incineration after  
258 disposal leads to a negative contribution of the end of life stage to the total CO<sub>2</sub>-equivalent emissions  
259 in all scenarios except COT\_1 and COT\_2. The use of labelled community mask (PES\_1 and PES\_2) has  
260 an intermediate environmental impact, the use of AFNOR masks (French label) being more  
261 advantageous than the TESTEX mask (Swiss label). The difference between the two is mainly due to  
262 the different number of reuses recommended between the two labels. Overall, the most  
263 advantageous scenarios are home-made cotton masks (COT\_2) and the extended use of medical  
264 masks through a wait and reuse strategy (PP\_4).

266 Figure 2 about here

268 Results similar to those of the carbon footprint are obtained by considering a broader impact indicator,  
269 such as UBP, which integrates water consumption (see Supplementary file S1). The impact related to  
270 use increases for all masks when recycled multiple times. The most advantageous scenarios remain

1  
2  
3 271 however the home-made cotton masks (COT\_2) and the extended use of medical masks through a  
4  
5 272 wait and reuse strategy (PP\_4). Notably, the impact of decontamination of medical masks by heating  
6  
7 273 (PP\_3) is more than doubled, making it less advantageous than the single-use scenario of medical  
8  
9 274 masks shipped from China by boat (PP\_1).

10 275

### 11 12 13 14 276 **Plastic leakage (PL)**

15  
16  
17 277 The impact of the different scenarios of mask use from the point of view of plastic leakage is  
18  
19 278 presented in Figure 3. Unsurprisingly, cotton masks do not generate plastic leakage. Disposable  
20  
21 279 medical masks have a high PL of 1.8 g/FU. However, this impact can be reduced by a factor of 10 by  
22  
23 280 reuse procedures, which proportionally reduce production needs.

24 281

25  
26  
27  
28  
29 282 *Figure 3 about here*

### 30 31 32 283 **Number of reuse**

33  
34  
35 284 The number of reuses used in the scenarios is based on an estimate of current practices and  
36  
37 285 recommendations. Arguably, this may change depending on usage conditions, material quality, or  
38  
39 286 changes in mask labelling requirements. The effect of the number of reuses on the GWP100 is shown  
40  
41 287 in figure 4. Interestingly, commercial cotton masks (COT\_1) reused less than 8 times generate more  
42  
43 288 CO<sub>2</sub>eq than disposable medical masks shipped by boat (PP\_1). Moreover, when used less than 17  
44  
45 289 times commercial cotton masks (COT\_1) generate more CO<sub>2</sub>eq than medical masks decontaminated  
46  
47 290 through dry heating (PP\_3). The increase in the number of reuse decreases the gap between the two  
48  
49 291 most advantageous scenarios: home-made cotton masks (COT\_2) and the recycling of medical masks  
50  
51 292 through a wait and reuse strategy (PP\_4). The curves for scenarios PES\_1 and PES\_2 are overlapping  
52  
53 293 in Figure 4 since the composition of EMPA and AFNOR masks has been assumed identical. The only  
54  
55 294 slight difference between these scenarios, although not significant enough to distinguish both curves  
56  
57 295 on the graph, stems from the distinct origins of the masks.



1  
2  
3 296  
4  
5  
6 297  
7  
8 298  
9  
10  
11 299  
12  
13  
14 300 **Discussion**  
15  
16 301 Consistent with what has been highlighted by other authors, our results show that switching from  
17 302 single-use to reusable masks can significantly reduce plastic leakage and climate change impact<sup>14</sup>.  
18  
19 303 However, analysis of the different scenarios shows considerable variation between reuse strategies,  
20 304 mainly due to the impact of production and recycling. A footprint reduction (GWP100 or UBP) of  
21 305 50% to 90% can be achieved by switching from a single-use medical mask to a reusable solution. For  
22 306 plastic leakage, this reduction can be from 60% to 100%. At the population level, these differences  
23 307 are not negligible. We quantified how much CO<sub>2</sub>eq impact and plastic leakage would be avoided  
24 308 within a year in Switzerland if 10% of the entire population was to shift from single-use masks  
25 309 transported by boat (PP\_1) to either a wait and reuse strategy for the same masks (PP\_4) or home-  
26 310 made cotton masks from old fabric (COT\_2). Results are reported in Table 2, considering a Swiss  
27 311 population 8'606'033 in 2019 (source: Federal Statistical Office).  
28  
29  
30  
31  
32  
33  
34  
35  
36  
37  
38  
39  
40  
41  
42  
43  
44  
45  
46 312  
47  
48 313 *Table 2. Environmental impact of a shift from the use of disposable masks to reuse strategies in 10%*  
49 314 *of the Swiss population.*  
50  
51  
52  
53 315 For an impact per passenger transport by aircraft (person.km) of 0.129 kgCO<sub>2</sub>eq (source: Reffnet.ch)  
54 316 and an average 1.5L plastic bottle weight of 32.6 g<sup>31</sup>, the uptake of the wait and reuse strategy for  
55 317 the medical masks (PP\_4) by 10% of the population would be equivalent to saving CO<sub>2</sub>eq emissions  
56 318 from 5'402 individual flights from Paris to New York and preventing 513'194 plastic bottles (1.5L)

Figure 4 about here

## Discussion

Consistent with what has been highlighted by other authors, our results show that switching from single-use to reusable masks can significantly reduce plastic leakage and climate change impact<sup>14</sup>. However, analysis of the different scenarios shows considerable variation between reuse strategies, mainly due to the impact of production and recycling. A footprint reduction (GWP100 or UBP) of 50% to 90% can be achieved by switching from a single-use medical mask to a reusable solution. For plastic leakage, this reduction can be from 60% to 100%. At the population level, these differences are not negligible. We quantified how much CO<sub>2</sub>eq impact and plastic leakage would be avoided within a year in Switzerland if 10% of the entire population was to shift from single-use masks transported by boat (PP\_1) to either a wait and reuse strategy for the same masks (PP\_4) or home-made cotton masks from old fabric (COT\_2). Results are reported in Table 2, considering a Swiss population 8'606'033 in 2019 (source: Federal Statistical Office).

|                   | CO <sub>2</sub> eq impact avoided<br>[t CO <sub>2</sub> eq.] | Plastic leakage avoided<br>[t PL] |
|-------------------|--------------------------------------------------------------|-----------------------------------|
| shifting to PP_4  | 4'077                                                        | 17                                |
| shifting to COT_2 | 4'400                                                        | 19                                |

*Table 2. Environmental impact of a shift from the use of disposable masks to reuse strategies in 10% of the Swiss population.*

For an impact per passenger transport by aircraft (person.km) of 0.129 kgCO<sub>2</sub>eq (source: Reffnet.ch) and an average 1.5L plastic bottle weight of 32.6 g<sup>31</sup>, the uptake of the wait and reuse strategy for the medical masks (PP\_4) by 10% of the population would be equivalent to saving CO<sub>2</sub>eq emissions from 5'402 individual flights from Paris to New York and preventing 513'194 plastic bottles (1.5L)

1  
2  
3 319 from being littered. Similarly, the uptake of home-made cotton masks (COT\_2) by the same  
4  
5 320 population share would result in CO<sub>2</sub>eq emissions savings analogous to 5'830 individual air travels  
6  
7 321 from Paris to New York, and a plastic leakage avoided corresponding to 570'219 plastic bottles  
8  
9  
10 322 (1.5L).

11  
12 323 The environmental impact assessment conducted in this study has several limitations. Data on mask  
13  
14 324 composition, transport and end of life are from the European context. The transposition of these  
15  
16 325 results to other regions, in particular regions with a higher production capacity of medical masks and  
17  
18 326 less reliance on imports, would lead to a modification of the GWP100 and UBP impact. Furthermore,  
19  
20 327 in the absence of precise market distribution data, mask composition and production data were  
21  
22 328 based on typical examples and scenarios rather than statistical data. In practice, there is some  
23  
24 329 variability in manufacturing and shipping arrangements due to different suppliers. From the point of  
25  
26 330 view of the effectiveness of their individual or collective protection, masks are not all equal. The  
27  
28 331 comparison of their performance is not obvious because several parameters influence their  
29  
30 332 effectiveness (droplet penetration, aerosol penetration, fitting to the face, wettability...)<sup>16</sup> and only  
31  
32 333 medical masks as well as labelled community masks (e.g. AFNOR label) have minimum performance  
33  
34 334 requirements for some of these parameters while a high variability in performance is to be expected  
35  
36 335 among unlabelled community masks. We performed an uncertainty analysis based on low and high  
37  
38 336 values for the littering rate (ranging from 0.2% to 12%, with the medium value being set at 2%). We  
39  
40 337 have observed that the plastic leakage results would be changing proportionally to the leakage rate  
41  
42 338 factor between the medium value and the low or high value, but that the climate change or UBP  
43  
44 339 impact results would deviate from the medium case by around 1% or below. No other uncertainty  
45  
46 340 analysis was undertaken for this study.

47  
48 341 The filtration efficiency of the membrane as such has been investigated by several experimental  
49  
50 342 studies. Aydin et al. report filtration efficiencies for large droplets in the 100 µ- 1mm range of over  
51  
52 343 98% for surgical masks and 93-98% for unlabelled community masks of different materials (cotton,  
53  
54 344 polyester and silk)<sup>32</sup>. For finer particles, the performance of unlabelled community masks is however

1  
2  
3 345 lower. In the 10 $\mu$  range (PM<sub>10</sub>), Neupane et al. show a filtration efficiency of 94% for surgical masks  
4  
5 346 and 63% and 84% for community masks<sup>33</sup>. Systematic reviews of the laboratory results obtained so  
6  
7 347 far suggest that community masks have satisfactory filtration efficiency for large particles (e.g. >  
8  
9 348 5 $\mu$ m), but that they have only limited effectiveness against aerosols.  
10  
11  
12 349 However, the overall performance of the masks is not limited to filtration efficiency alone and will be  
13  
14 350 affected by leaks due to poor fitting to the face, but also by the way the masks are used. Wearing a  
15  
16 351 face mask in a community logic is moreover primarily intended as a collective protection (by  
17  
18 352 reducing the emission of the wearer), rather than an individual protection. This collective  
19  
20 353 effectiveness is difficult to quantify due to the complexity of exposure situations and the presence of  
21  
22 354 other contamination routes (e.g surface contamination). Randomized studies conducted previously  
23  
24 355 on the transmission of viral infections in the community, showed that wearing a mask provided  
25  
26 356 some protection in the most adherent individuals<sup>34</sup> or when mask use is accompanied by hand  
27  
28 357 hygiene measures and/or education on viral infections<sup>35 36</sup>.  
29  
30  
31  
32  
33 358 The choice of the most appropriate strategy must consider both environmental impact and  
34  
35 359 effectiveness. In terms of mask performance, expectations are generally quite limited from a  
36  
37 360 community protection perspective. To some extent, all masks contribute to community protection by  
38  
39 361 reducing droplet emissions and, to a lesser extent, aerosol emissions from infected wearers. In the  
40  
41 362 absence of minimum performance requirements, this protection is highly uncertain for unlabeled  
42  
43 363 community face masks. Standardized masks, such as medical masks, which offer guarantees in  
44  
45 364 terms of performance and reproducibility, are therefore more advantageous from this point of view.  
46  
47 365 Labelled community masks are also an interesting alternative. Their environmental performance is  
48  
49 366 currently limited by the number of planned cycles of use, which requires frequent replacement. An  
50  
51 367 increase in the number of use cycles covered by the label would reduce significantly their  
52  
53 368 environmental impact. The future use of materials that are less polluting than plastic materials for  
54  
55 369 the manufacture of masks could be an alternative to reduce the environmental cost of their  
56  
57 370 manufacture and plastic leakage. For community masks, this adjustment is relatively simple because  
58  
59 371 many of them are made of cotton and some manufacturers also offer masks made of recycled

1  
2  
3 372 plastic. For medical masks, a more important effort is necessary because it requires the complete  
4  
5 373 accreditation of the mask according to EN14683. The scale of the uptake of the reuse strategies  
6  
7 374 suggested in the study by the population will depend on the interest of the government to endorse  
8  
9  
10 375 such practices for community masks and on the efficiency of public awareness campaign. Last but  
11  
12 376 not least, adopting a wait and reuse strategy with medical masks is probably the most economical,  
13  
14 377 which is important in terms of access to protective measures for people with limited financial  
15  
16 378 resources<sup>37</sup>.

## 379 **Conclusion**

380 The use of medical masks with a wait-and-reuse strategy appears to be the most appropriate, as it is  
381 a good compromise between environmental impact and protective efficacy and is accessible in  
382 economic terms. Labeled community masks are also an interesting alternative, with an increase in  
383 the number of use cycles. Overall, our results highlight the need to develop procedures and the  
384 legal/operational framework to extend the use of protective equipment during a pandemic. Such an  
385 approach would not only reduce the environmental impact of the masks, but also make the public  
386 health system more resilient in the event of equipment shortages. They also highlight the need to  
387 explore the use of materials that are less polluting than plastics to make the filter material.

388

389

## 390 **Acknowledgments**

391 The authors would like to thank Prof. J. Cornuz from Unisanté, for his advice and ideas in the  
392 development of this study.

## 393 **Competing interests**

394 The authors declare no competing interest

## 395 **Author contribution**

1  
2  
3 396 JB, NS, BG, KS and DV developed the study concept and design. KS and DV conducted the literature  
4  
5 397 review. AB and JB conducted the impact assessment and data analysis. All authors contributed to the  
6  
7 398 data interpretation. DV wrote the first draft of the manuscript with contributions from JB, AB and  
8  
9  
10 399 NS. All authors contributed to and have approved the final manuscript.

#### 11 12 400 **Funding**

13  
14  
15 401 The authors received no funding to perform this study.

#### 16 17 402 **Patient consent for publication**

18  
19  
20 403 Not required

#### 21 22 404 **Data availability statement**

23  
24  
25 405 Detailed primary and secondary data used for this study are available upon request.

#### 26 27 406 **Ethics approval**

28  
29  
30 407 This study does not involve research with human subjects.

31  
32 408

33  
34 409  
35  
36  
37  
38  
39  
40  
41  
42  
43  
44  
45  
46  
47  
48  
49  
50  
51  
52  
53  
54  
55  
56  
57  
58  
59  
60

1  
2  
3  
4 410 **References**

- 5  
6 411 1. Le Quéré C, Jackson RB, Jones MW, et al. Temporary reduction in daily global CO<sub>2</sub> emissions during  
7 412 the COVID-19 forced confinement. *Nature Climate Change* 2020;10(7):647-53. doi:  
8 413 10.1038/s41558-020-0797-x
- 9 414 2. Tollefson J. COVID curbed carbon emissions in 2020 - but not by much. *Nature* 2021;589(7842):343.  
10 415 doi: 10.1038/d41586-021-00090-3 [published Online First: 2021/01/17]
- 11 416 3. Patel PP, Mondal S, Ghosh KG. Some respite for India's dirtiest river? Examining the Yamuna's water  
12 417 quality at Delhi during the COVID-19 lockdown period. *Science of The Total Environment*  
13 418 2020;744:140851. doi: <https://doi.org/10.1016/j.scitotenv.2020.140851>
- 14 419 4. Almond D, Du X, Zhang S. Did COVID-19 improve air quality near hubei? . In: 2020 NBoER, ed.,  
15 420 2020.
- 16 421 5. Klemeš JJ, Fan YV, Jiang P. The energy and environmental footprints of COVID-19 fighting  
17 422 measures - PPE, disinfection, supply chains. *Energy (Oxf)* 2020;211:118701-01. doi:  
18 423 10.1016/j.energy.2020.118701 [published Online First: 2020/08/27]
- 19 424 6. Gillingham KT, Knittel CR, Li J, et al. The Short-run and Long-run Effects of Covid-19 on Energy and  
20 425 the Environment. *Joule* 2020;4(7):1337-41. doi: <https://doi.org/10.1016/j.joule.2020.06.010>
- 21 426 7. Benson NU, Basse DE, Palanisami T. COVID pollution: impact of COVID-19 pandemic on global  
22 427 plastic waste footprint. *Heliyon* 2021;7(2):e06343. doi:  
23 428 <https://doi.org/10.1016/j.heliyon.2021.e06343>
- 24 429 8. Patrício Silva AL, Prata JC, Walker TR, et al. Increased plastic pollution due to COVID-19 pandemic:  
25 430 Challenges and recommendations. *Chemical Engineering Journal* 2021;405:126683. doi:  
26 431 <https://doi.org/10.1016/j.cej.2020.126683>
- 27 432 9. Fadare OO, Okoffo ED. Covid-19 face masks: A potential source of microplastic fibers in the  
28 433 environment. *Science of The Total Environment* 2020;737:140279. doi:  
29 434 <https://doi.org/10.1016/j.scitotenv.2020.140279>
- 30 435 10. Aragaw TA. Surgical face masks as a potential source for microplastic pollution in the COVID-19  
31 436 scenario. *Mar Pollut Bull* 2020;159:111517-17. doi: 10.1016/j.marpolbul.2020.111517  
32 437 [published Online First: 2020/07/25]
- 33 438 11. Eurostat. Which country imported the most face masks? : EU Commission; 2021 [Available from:  
34 439 <https://ec.europa.eu/eurostat/en/web/products-eurostat-news/-/ddn-20201006-12021>.
- 35 440 12. Shruti VC, Pérez-Guevara F, Elizalde-Martínez I, et al. Reusable masks for COVID-19: A missing  
36 441 piece of the microplastic problem during the global health crisis. *Mar Pollut Bull*  
37 442 2020;161:111777. doi: <https://doi.org/10.1016/j.marpolbul.2020.111777>
- 38 443 13. Phelps Bondaroff T, Cooke S. Masks on the Beach: The impact of COVID-19 on marine plastic  
39 444 pollution. Gary Stokes ed: OceansAsia, 2020.
- 40 445 14. Allison AL, Ambrose-Dempster E, Domenech Aparsi T, et al. The impact and effectiveness of the  
41 446 general public wearing masks to reduce the spread of pandemics in the UK: a multidisciplinary  
42 447 comparison of single-use masks versus reusable face masks: UCL Press, 2020.
- 43 448 15. Klemeš JJ, Fan YV, Tan RR, et al. Minimising the present and future plastic waste, energy and  
44 449 environmental footprints related to COVID-19. *Renewable and Sustainable Energy Reviews*  
45 450 2020;127:109883. doi: <https://doi.org/10.1016/j.rser.2020.109883>
- 46 451 16. Brainard J, Jones NR, Lake IR, et al. Community use of face masks and similar barriers to prevent  
47 452 respiratory illness such as COVID-19: a rapid scoping review. *Euro surveillance : bulletin*  
48 453 *Europeen sur les maladies transmissibles = European communicable disease bulletin*  
49 454 2020;25(49) doi: 10.2807/1560-7917.es.2020.25.49.2000725 [published Online First:  
50 455 2020/12/12]
- 51 456 17. Chua MH, Cheng W, Goh SS, et al. Face Masks in the New COVID-19 Normal: Materials, Testing,  
52 457 and Perspectives. *Research* 2020;2020:7286735. doi: 10.34133/2020/7286735
- 53 458 18. Liao L, Xiao W, Zhao M, et al. Can N95 Respirators Be Reused after Disinfection? How Many  
54 459 Times? *ACS Nano* 2020;14(5):6348-56. doi: 10.1021/acsnano.0c03597 [published Online First:  
55 460 2020/05/06]
- 56 461 19. Pascoe MJ, Robertson A, Crayford A, et al. Dry heat and microwave generated steam protocols for  
57 462 the rapid decontamination of respiratory personal protective equipment in response to COVID-  
58 463 19-related shortages. *The Journal of hospital infection* 2020 doi: 10.1016/j.jhin.2020.07.008  
59 464 [published Online First: 2020/07/12]
- 60 465 20. Ou Q, Pei C, Chan Kim S, et al. Evaluation of decontamination methods for commercial and  
466 alternative respirator and mask materials - view from filtration aspect. *J Aerosol Sci*  
467 2020;150:105609-09. doi: 10.1016/j.jaerosci.2020.105609 [published Online First: 2020/06/24]

- 1  
2  
3 468 21. Chin A, Chu J, Perera M, et al. Stability of SARS-CoV-2 in different environmental conditions.  
4 469 *medRxiv* 2020:2020.03.15.20036673. doi: 10.1101/2020.03.15.20036673
- 5 470 22. AFNOR. Masques barrières - Guide d'exigences minimales, de méthodes d'essais, de confection  
6 471 et d'usage. Paris: AFNOR SPEC S76-001 version 1.10, 2020:45.
- 7 472 23. TESTEX. Factsheet - Community Masks Zurich: TESTEX AG; 2020 [updated January 2021.  
8 473 Available from: <https://www.testex.com/en/communitymask/>.
- 9 474 24. IPCC. Climate change. The Intergovernmental Panel on Climate Change, scientific assessment;  
10 475 Agriculture, Ecosystems & Environment. Cambridge: Cambridge University Press, 1990:339.
- 11 476 25. Boucher J, Billard G, Simeone E, et al. The marine plastic footprint : towards a science-based metric  
12 477 for measuring marine plastic leakage and increasing the materiality and circularity of plastic.  
13 478 Gland, Switzerland: IUCN, Global Marine and Polar Programme, 2020:70.
- 14 479 26. Jambeck JR, Geyer R, Wilcox C, et al. Plastic waste inputs from land into the ocean. *Science*  
15 480 2015;347(6223):768. doi: 10.1126/science.1260352
- 16 481 27. Boucher J, Faure F, Pompini O, et al. (Micro) plastic fluxes and stocks in Lake Geneva basin. *TrAC*  
17 482 *Trends in Analytical Chemistry* 2019;112:66-74. doi: <https://doi.org/10.1016/j.trac.2018.11.037>
- 18 483 28. ICF e. Assessment of measures to reduce marine litter from single use plastics. Luxembourg:  
19 484 European Commission, Directorate-General for Environment, 2018.
- 20 485 29. Bourrier C. Washing Machine - ETH Sustainability Summer School 2011 [Web archive]. Zurich:  
21 486 ETH; 2011 [Available from: [http://webarchiv.ethz.ch/sustainability-](http://webarchiv.ethz.ch/sustainability-v2/lehre/Sommerakademien/so2011/washies_report.pdf)  
22 487 [v2/lehre/Sommerakademien/so2011/washies\\_report.pdf](http://webarchiv.ethz.ch/sustainability-v2/lehre/Sommerakademien/so2011/washies_report.pdf).
- 23 488 30. Reimann D. CEWEP Energy Report III: Results of Specific Data for Energy, R1 Plant Efficiency  
24 489 Factor and NCV of 314 European Waste-to-Energy (WtE) Plants. Bamberg, Germany: CEWEP,  
25 490 Confederation of European Waste-to-Energy Plants, 2012.
- 26 491 31. Islam M, Uddin MJ, Alshehri K. Plastic Waste and Carbon Footprint Generation Due to the  
27 492 Consumption of Bottled Waters in Saudi Arabia. *Research & Development in Material Science*  
28 493 2018;5 doi: 10.31031/RDMS.2018.05.000604
- 29 494 32. Aydin O, Emon B, Cheng S, et al. Performance of fabrics for home-made masks against the spread  
30 495 of COVID-19 through droplets: A quantitative mechanistic study. *Extreme Mechanics Letters*  
31 496 2020;40:100924. doi: 10.1016/j.eml.2020.100924 [published Online First: 2020/08/25]
- 32 497 33. Neupane BB, Mainali S, Sharma A, et al. Optical microscopic study of surface morphology and  
33 498 filtering efficiency of face masks. *PeerJ* 2019;7:e7142-e42. doi: 10.7717/peerj.7142
- 34 499 34. MacIntyre CR, Cauchemez S, Dwyer DE, et al. Face mask use and control of respiratory virus  
35 500 transmission in households. *Emerging infectious diseases* 2009;15(2):233-41. doi:  
36 501 10.3201/eid1502.081167
- 37 502 35. Aiello AE, Perez V, Coulborn RM, et al. Facemasks, hand hygiene, and influenza among young  
38 503 adults: a randomized intervention trial. *PloS one* 2012;7(1):e29744-e44. doi:  
39 504 10.1371/journal.pone.0029744 [published Online First: 2012/01/25]
- 40 505 36. Larson EL, Ferng YH, Wong-McLoughlin J, et al. Impact of non-pharmaceutical interventions on  
41 506 URIs and influenza in crowded, urban households. *Public health reports (Washington, DC :  
42 507 1974)* 2010;125(2):178-91. doi: 10.1177/003335491012500206 [published Online First:  
43 508 2010/03/20]
- 44 509 37. Siu JY. Health inequality experienced by the socially disadvantaged populations during the outbreak  
45 510 of COVID-19 in Hong Kong: An interaction with social inequality. *Health & social care in the  
46 511 community* 2020 doi: 10.1111/hsc.13214 [published Online First: 2020/10/31]

47 513 **Figure 1. Illustration of the system boundary for all scenarios involved in the study.**

48 514  
49 515 **Figure 2. Footprint expressed in GWP100 (kg CO<sub>2</sub> eq./FU) for different scenario of mask uses.**

50 516  
51 517 **Figure 3. Footprint expressed in plastic leakage (g/FU) for different scenarios of mask uses.**

52 518  
53 519 **Figure 4. Footprint expressed in GWP100 (kgCO<sub>2</sub>eq./FU) for different scenarios as a function of  
54 520 number of uses.**

55 521  
56  
57  
58  
59  
60

1  
2  
3  
4  
5  
6  
7  
8  
9  
10  
11  
12  
13  
14  
15  
16  
17  
18  
19  
20  
21  
22  
23  
24  
25  
26  
27  
28  
29  
30  
31  
32  
33  
34  
35  
36  
37  
38  
39  
40  
41  
42  
43  
44  
45  
46  
47  
48  
49  
50  
51  
52  
53  
54  
55  
56  
57  
58  
59  
60

522

523

For peer review only



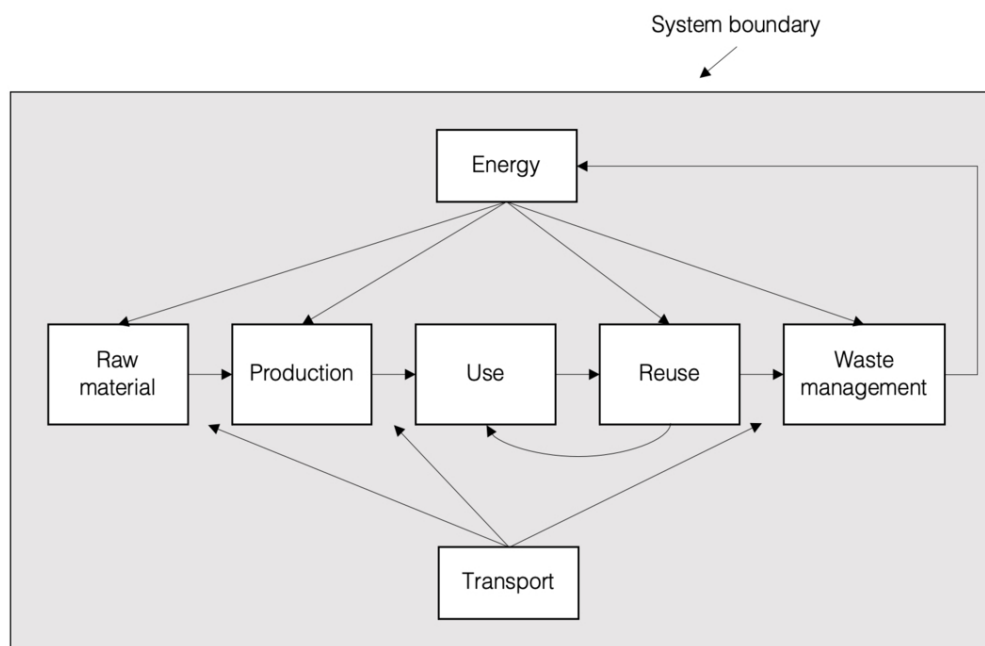

Figure 1. Illustration of the system boundary for all scenarios involved in the study.

89x89mm (300 x 300 DPI)

1  
2  
3  
4  
5  
6  
7  
8  
9  
10  
11  
12  
13  
14  
15  
16  
17  
18  
19  
20  
21  
22  
23  
24  
25  
26  
27  
28  
29  
30  
31  
32  
33  
34  
35  
36  
37  
38  
39  
40  
41  
42  
43  
44  
45  
46  
47  
48  
49  
50  
51  
52  
53  
54  
55  
56  
57  
58  
59  
60

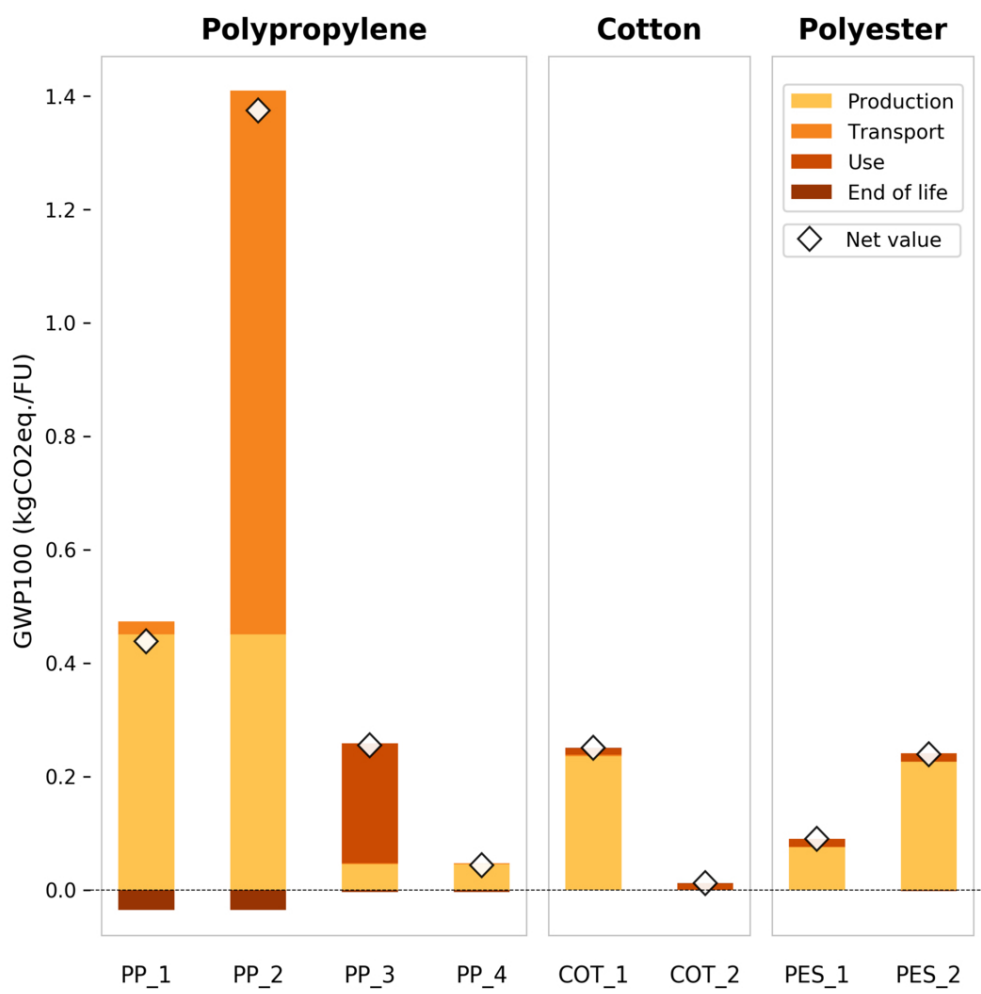

Figure 2. Footprint expressed in GWP100 (kg CO2 eq./FU) for different scenario of mask uses.

89x89mm (300 x 300 DPI)

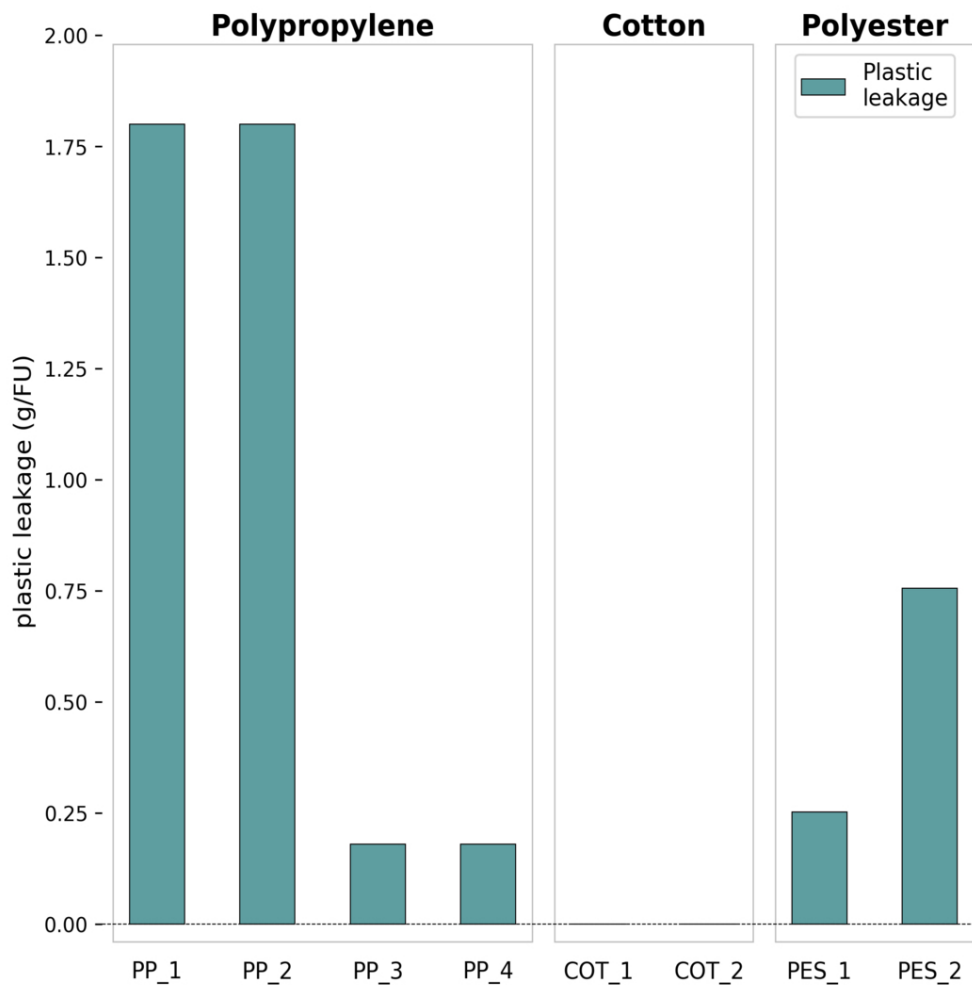

Figure 3. Footprint expressed in plastic leakage (g/FU) for different scenarios of mask uses.

89x89mm (300 x 300 DPI)

1  
2  
3  
4  
5  
6  
7  
8  
9  
10  
11  
12  
13  
14  
15  
16  
17  
18  
19  
20  
21  
22  
23  
24  
25  
26  
27  
28  
29  
30  
31  
32  
33  
34  
35  
36  
37  
38  
39  
40  
41  
42  
43  
44  
45  
46  
47  
48  
49  
50  
51  
52  
53  
54  
55  
56  
57  
58  
59  
60

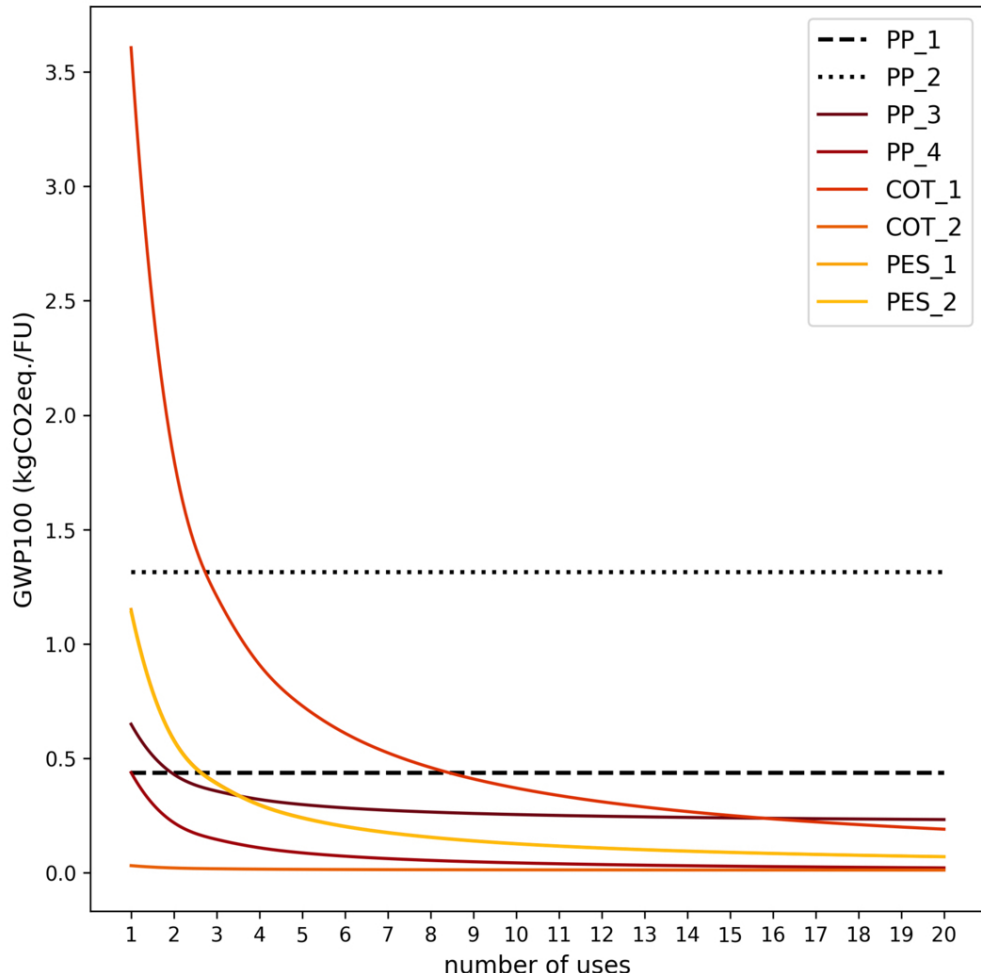

Figure 4. Footprint expressed in GWP100 (kgCO2eq./FU) for different scenarios as a function of number of uses.

89x89mm (300 x 300 DPI)

## Appendix S1

In addition to the Global Warming Potential (GWP100) index, we assessed other environmental impacts with an aggregated impact metric specific to Switzerland called UBP, which is the abbreviation of the German word “Umweltbelastungspunkte”. The UBP method aggregates all individual impacts from a standard LCA assessment into a single parameter. It is based on legally defined targets for pollutant emissions and resource consumption, and measures the differences between current emission values and these specific target values. The further the current status is from the target, the greater the number of points assigned to an emission. For more details, see Frischknecht et al. (Frischknecht and Büsler Knöpfel 2013).

The UBP impacts of the different scenarios of mask use are presented in Figure S1. Similarly to the CO<sub>2</sub>-equivalent impacts (see Figure 1), the use of disposable masks brought by plane (scenario PP\_2) results in the highest impact in terms of UBP. The largest discrepancies between the global warming potential and UBP results occur in scenarios PP\_3 and COT\_1. In scenario PP\_3, the UBP impact of the use phase is very large with an unfavourable contribution of the electricity consumption to run the oven, while the production phase of the cotton fabric increases the relative impact of cotton masks manufactured abroad (scenario COT\_1) with respect to other scenarios when compared with the global warming potential results. Nonetheless, the least impactful scenarios remain the home-made cotton masks (COT\_2) and the extended use of medical masks through a wait and reuse strategy (PP\_4), which provides a coherent picture when it comes to the best practices for community protection with a mask in times of pandemic.

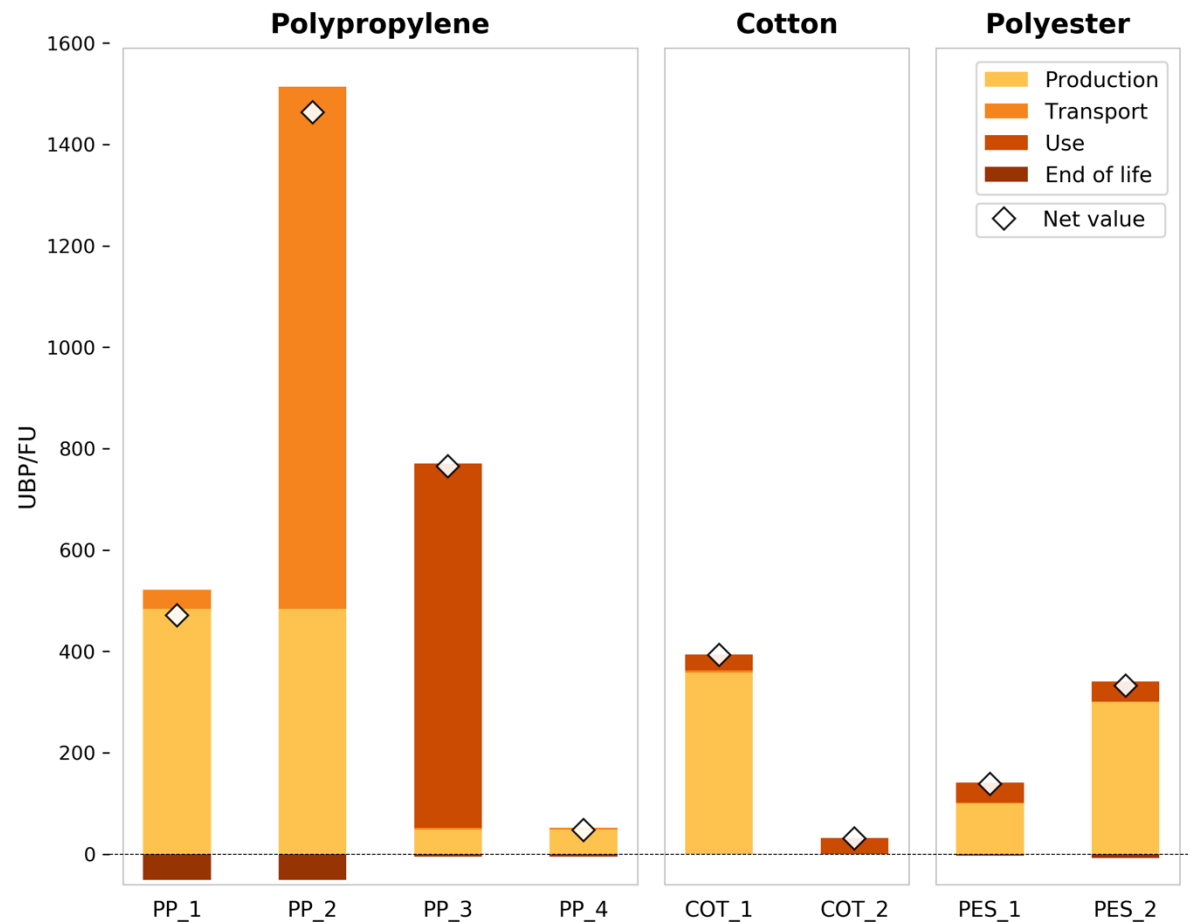

Figure S1. Footprint expressed in UBP /FU for different scenario of mask uses.

Frischknecht, Rolf, and Sybille Büsser Knöpfel. 2013. "Swiss Eco-Factors 2013 according to the Ecological Scarcity Method. Methodological fundamentals and their application in Switzerland." In *Environmental studies* no. 1330, 254. Bern: Federal Office for the Environment.
